# Supplementary material
Source: PubMed Central journal article supplement (PMC6606861)
Supplement: AEM.00293-19-s0001.pdf [file AEM.00293-19-s0001.pdf]

## Supporting information

Unusual and highly bioactive sesterterpenes synthesized by *Pleurotus ostreatus* during the co-culture with *Trametes robiniophila* Murr

Xiao-Ting Shen<sup>1†</sup>, Xu-Hua Mo<sup>1†</sup>, Li-Ping Zhu<sup>1†</sup>, Ling-Ling Tan<sup>1†</sup>, Feng-Yu Du<sup>2</sup>, Qian-Wen Wang<sup>3</sup>, Yuan-Ming Zhou<sup>3</sup>, Xiao-Jie Yuan<sup>1</sup>, Bin Qiao<sup>4</sup>, Song Yang<sup>1,5\*</sup>

1. School of Life Sciences, Qingdao Agricultural University, Shandong Province Key Laboratory of Applied Mycology, and Qingdao International Center on Microbes Utilizing Biogas, Qingdao, Shandong Province, China
2. College of Chemistry and Pharmacy, Qingdao Agricultural University, Qingdao, Shandong Province, China.
3. Central Laboratory, Qingdao Agricultural University, Qingdao, Shandong Province, China
4. School of Chemical Engineering and Technology, Tianjin University, Tianjin, China
5. Key Laboratory of Systems Bioengineering, Ministry of Education, Tianjin University, Tianjin, China

\*Correspondence: Song Yang, School of Life Sciences, Qingdao Agricultural University, Shandong Province Key Laboratory of Applied Mycology, and Qingdao International Center on Microbes Utilizing Biogas, Qingdao, Shandong Province, 266109, China. Email: yangsong1209@163.com. Telephone: +86-532-86080640

†Xiao-Ting Shen, Xu-Hua Mo, Li-Ping Zhu and Ling-Ling Tan contributed equally to this work.

**Table S1. List of 16 basidiomycetes fungi**

| Strain                              | Strain number | Order           | Family              | Genus                |
|-------------------------------------|---------------|-----------------|---------------------|----------------------|
| <i>Pleurotuso streatus</i>          | SY10          | Agaricales      | Pleurotaceae        | <i>Pleurotus</i>     |
| <i>Lentinus edodes</i>              | SY103         | Agaricales      | Lentinula           | <i>Lentinus</i>      |
| <i>Agaricus bisporus</i>            | SY153         | Agaricales      | Agaraceae           | <i>Agaricus</i>      |
| <i>Flammulina velutipes</i>         | SY204         | Agaricales      | Physalacriaceae     | <i>Flammulina</i>    |
| <i>Pleurotus eryngii</i>            | SY302         | Agaricales      | Pleurotaceae        | <i>Pleurotus</i>     |
| <i>Pleurotus nebrodensis</i>        | SY429         | Agaricales      | Pleurotaceae        | <i>Pleurotus</i>     |
| <i>Schizophyllum commune</i>        | SY658         | Agaricales      | Schizophyllaceae    | <i>Schizophyllum</i> |
| <i>Grifola frondosa</i>             | SY251         | Polyporales     | Polyporaceae        | <i>Grigola</i>       |
| <i>Ganoderma applanatum</i>         | SY330         | Polyporales     | GanodermataceaeDonk | <i>Ganoderma</i>     |
| <i>Ganoderma sinense</i>            | SY337         | Polyporales     | GanodermataceaeDonk | <i>Ganoderma</i>     |
| <i>Ganoderma lucidum</i>            | SY341         | Polyporales     | GanodermataceaeDonk | <i>Ganoderma</i>     |
| <i>Trametes versicolor</i>          | SY630         | Polyporales     | Polyporaceae        | <i>Trametes</i>      |
| <i>Trametes robiniophia Murr</i>    | SY636         | Polyporales     | Polyporaceae        | <i>Trametes</i>      |
| <i>Phellinus igniarius</i>          | SY489         | Hymenochaetales | Hymenochaetaceae    | <i>Phellinus</i>     |
| <i>Cordycep smilitaris</i>          | SY501         | Hypocreales     | Clavicipitaceae     | <i>Cordyceps</i>     |
| <i>Sclerotium Xylariae Nigripis</i> | SY687         | Xylariales      | Xylariaceae         | <i>Sclerotium</i>    |

**Table S2. List of induced features in the co-culture of *T. robiniophila* Murr and *P. ostreatus*, and corresponding production fungus identified by <sup>13</sup>C-labeling analysis.**

| M/Z ( - )  | RT/min | Predictive formula                                            | Difference        | Produced by fungus          |
|------------|--------|---------------------------------------------------------------|-------------------|-----------------------------|
| 136.042    | 3.43   | C <sub>7</sub> H <sub>7</sub> NO <sub>2</sub>                 | newly synthesized | <i>T. Robiniophila</i> Murr |
| 138.0207   | 10.65  | C <sub>6</sub> H <sub>5</sub> NO <sub>3</sub>                 | newly synthesized | <i>T. Robiniophila</i> Murr |
| 147.046    | 6.60   | C <sub>9</sub> H <sub>8</sub> O <sub>2</sub>                  | newly synthesized | <i>T. Robiniophila</i> Murr |
| 149.0256   | 8.23   | C <sub>6</sub> H <sub>6</sub> N <sub>4</sub> O                | newly synthesized | NL2                         |
| 165.0554   | 6.60   | C <sub>9</sub> H <sub>10</sub> O <sub>3</sub>                 | newly synthesized | <i>T. Robiniophila</i> Murr |
| 176.0714   | 4.54   | C <sub>10</sub> H <sub>11</sub> NO <sub>2</sub>               | newly synthesized | <i>T. Robiniophila</i> Murr |
| 204.0564   | 4.54   | C <sub>11</sub> H <sub>11</sub> NO <sub>3</sub>               | newly synthesized | NL2                         |
| 218.0808   | 13.02  | C <sub>12</sub> H <sub>13</sub> NO <sub>3</sub>               | newly synthesized | <i>T. Robiniophila</i> Murr |
| 269.1746   | 15.15  | C <sub>15</sub> H <sub>26</sub> O <sub>4</sub>                | newly synthesized | <i>P. ostreatus</i>         |
| 271.0716   | 2.51   | C <sub>14</sub> H <sub>12</sub> N <sub>2</sub> O <sub>4</sub> | newly synthesized | <i>T. Robiniophila</i> Murr |
| 345.2279   | 9.08   | C <sub>18</sub> H <sub>34</sub> O <sub>6</sub>                | newly synthesized | <i>T. Robiniophila</i> Murr |
| 363.1112   | 10.89  | C <sub>20</sub> H <sub>12</sub> N <sub>8</sub>                | newly synthesized | NL1                         |
| 365.2677   | 21.16  | C <sub>18</sub> H <sub>34</sub> N <sub>6</sub> O <sub>2</sub> | newly synthesized | NL2                         |
| 371.1203   | 10.10  | C <sub>15</sub> H <sub>16</sub> N <sub>8</sub> O <sub>4</sub> | newly synthesized | <i>P. ostreatus</i>         |
| 379.0918   | 3.40   | C <sub>20</sub> H <sub>16</sub> N <sub>2</sub> O <sub>6</sub> | newly synthesized | NL1                         |
| 385.1325   | 11.12  | C <sub>22</sub> H <sub>18</sub> N <sub>4</sub> O <sub>3</sub> | newly synthesized | NL1                         |
| 406.1034   | 2.27   | C <sub>21</sub> H <sub>17</sub> N <sub>3</sub> O <sub>6</sub> | newly synthesized | NL1                         |
| 421.2952   | 18.48  | C <sub>25</sub> H <sub>42</sub> O <sub>5</sub>                | newly synthesized | NL1                         |
| 423.3113   | 19.07  | C <sub>25</sub> H <sub>44</sub> O <sub>5</sub>                | newly synthesized | <i>P. ostreatus</i>         |
| 425.3266   | 20.07  | C <sub>25</sub> H <sub>46</sub> O <sub>5</sub>                | newly synthesized | <i>P. ostreatus</i>         |
| 439.3084   | 15.73  | C <sub>25</sub> H <sub>44</sub> O <sub>6</sub>                | newly synthesized | <i>P. ostreatus</i>         |
| 441.3218   | 15.95  | C <sub>25</sub> H <sub>46</sub> O <sub>6</sub>                | newly synthesized | <i>P. ostreatus</i>         |
| 455.3381   | 21.58  | C <sub>26</sub> H <sub>48</sub> O <sub>6</sub>                | newly synthesized | <i>P. ostreatus</i>         |
| 471.3312 * | 15.28  | C <sub>25</sub> H <sub>46</sub> O <sub>5</sub>                | newly synthesized | <i>P. ostreatus</i>         |
| 487.3269 * | 13.89  | C <sub>25</sub> H <sub>46</sub> O <sub>6</sub>                | newly synthesized | <i>P. ostreatus</i>         |

|            |       |                                                               |                          |                            |
|------------|-------|---------------------------------------------------------------|--------------------------|----------------------------|
| 489.3451 * | 12.30 | C <sub>25</sub> H <sub>48</sub> O <sub>6</sub>                | newly synthesized        | <i>P. ostreatus</i>        |
| 541.1326   | 4.29  | C <sub>27</sub> H <sub>26</sub> O <sub>12</sub>               | newly synthesized        | NL1                        |
| 543.1519   | 2.53  | C <sub>28</sub> H <sub>24</sub> N <sub>4</sub> O <sub>8</sub> | newly synthesized        | NL2                        |
| 563.3367   | 18.95 | C <sub>31</sub> H <sub>44</sub> N <sub>6</sub> O <sub>4</sub> | newly synthesized        | <i>P. ostreatus</i>        |
| 142.0609   | 3.39  | C <sub>6</sub> H <sub>9</sub> NO <sub>3</sub>                 | increased ( 13.3±1.7 )   | <i>T. RobiniophilaMurr</i> |
| 212.0829   | 11.36 | C <sub>10</sub> H <sub>15</sub> NO <sub>4</sub>               | increased ( 25.8±3.2 )   | <i>T. RobiniophilaMurr</i> |
| 216.1114   | 14.51 | C <sub>13</sub> H <sub>15</sub> NO <sub>2</sub>               | increased ( 23.2±3.7 )   | <i>T. RobiniophilaMurr</i> |
| 226.1140   | 14.04 | C <sub>11</sub> H <sub>17</sub> NO <sub>4</sub>               | increased ( 8.6±5.3 )    | <i>T. RobiniophilaMurr</i> |
| 243.1289   | 4.14  | C <sub>7</sub> H <sub>16</sub> N <sub>8</sub> O <sub>2</sub>  | increased ( 12.7±2.8 )   | <i>T. RobiniophilaMurr</i> |
| 269.1836   | 15.72 | C <sub>17</sub> H <sub>22</sub> N <sub>2</sub> O              | increased ( 13.9±5.7 )   | <i>T. RobiniophilaMurr</i> |
| 329.1615   | 15.50 | C <sub>25</sub> H <sub>30</sub>                               | increased ( 25.9±6.4 )   | <i>T. RobiniophilaMurr</i> |
| 249.1482   | 17.93 | C <sub>14</sub> H <sub>22</sub> N <sub>2</sub> O <sub>2</sub> | increased ( 9.2±3.8 ) #  | Both                       |
| 251.1634   | 18.01 | C <sub>14</sub> H <sub>24</sub> N <sub>2</sub> O <sub>2</sub> | increased ( 17.3±3.5 ) # | Both                       |
| 281.1364   | 14.36 | C <sub>14</sub> H <sub>22</sub> N <sub>2</sub> O <sub>4</sub> | increased ( 14.9±4.7 )   | <i>P. ostreatus</i>        |
| 285.1696   | 13.31 | C <sub>14</sub> H <sub>26</sub> N <sub>2</sub> O <sub>4</sub> | increased ( 15.4±3.5 )   | <i>P. ostreatus</i>        |
| 287.1807   | 9.17  | C <sub>14</sub> H <sub>28</sub> N <sub>2</sub> O <sub>4</sub> | increased ( 18.1±3.7 )   | <i>P. ostreatus</i>        |
| 363.0139   | 15.88 | C <sub>21</sub> H <sub>32</sub> O <sub>5</sub>                | increased ( 22.3±4.2 )   | <i>P. ostreatus</i>        |
| 387.1484   | 11.70 | C <sub>18</sub> H <sub>24</sub> N <sub>6</sub> O <sub>4</sub> | increased ( 27.3±1.7 )   | <i>P. ostreatus</i>        |
| 399.2743   | 14.13 | C <sub>21</sub> H <sub>40</sub> N <sub>2</sub> O <sub>5</sub> | increased ( 32.1±5.7 )   | <i>P. ostreatus</i>        |

NL1: No <sup>13</sup>C-labeling was observed in the mono-culture after stimulation by the co-culture; NL2: No <sup>13</sup>C-labeling was observed due to low signal intensity in the co-culture;

\* m/z of features were [ M+CH<sub>2</sub>O<sub>2</sub>-H ]<sup>-</sup>;

# Differences of the intensities of m/z 249.1482 and m/z 251.1634 were compared with those in the mono-culture of *P. ostreatus* and in the mono-culture of *T. robiniophilaMurr*, respectively.

**Table S3 Putative gene clusters involved in terpene biosynthesis were predicted by AntiSMASH.**

| Cluster    | Scaffold accession | Product type                      | Start                                                    | End     | Protein ID | Protein size A.A. | Putative function                                   | Identity with the similar protein by NCBI-BlastP                |
|------------|--------------------|-----------------------------------|----------------------------------------------------------|---------|------------|-------------------|-----------------------------------------------------|-----------------------------------------------------------------|
| cluster 1  | KL198004.1         | Terpene                           | 1663722                                                  | 1687415 |            |                   |                                                     |                                                                 |
|            |                    |                                   |                                                          |         | KDQ33036   | 633               | hypothetical protein                                | 38%, KIM79710.1, Piloderma croceum F 1598                       |
|            |                    |                                   |                                                          |         | KDQ33037   | 391               | TAP42-like protein                                  | 59%, OCH93879.1, Obba rivulosa                                  |
|            |                    |                                   |                                                          |         | KDQ33038   | 212               | GTP binding protein                                 | 92%, XP_001874941.1, Laccaria bicolor S238N-H82                 |
|            |                    |                                   |                                                          |         | KDQ33039   | 595               | Methylenetetrahydrofolate reductase 2               | 67%, RDB21461.1, Hypsizygus marmoreus                           |
|            |                    |                                   |                                                          |         | KDQ33040   | 183               | Metallo-dependent phosphatase                       | 88%, XP_007308813.1, Stereum hirsutum FP-91666 SS1              |
|            |                    |                                   |                                                          |         | KDQ33041   | 504               | transcription factor/hypothetical protein           | 35%, KPA39034.1, Fusarium langsethiae                           |
|            |                    |                                   |                                                          |         | KDQ33042   | 324               | putative mnn4-regulates the mannosylphosphorylation | 64%, ESK90200.1, Moniliophthora roleri MCA 2997                 |
|            |                    |                                   |                                                          |         | KDQ33043   | 360               | terpenoid synthase                                  | 75%, KZT27334.1, Neolentinus lepideus HHB14362 ss-1             |
|            |                    |                                   |                                                          |         | KDQ33044   | 330               | activator of Hsp90 ATPase                           | 61%, PAV23969.1, Pyrrhoderma noxium                             |
| KDQ33045   | 321                | cell division/GTP binding protein | 91%, XP_001886019.1, Laccaria bicolor S238N-H82          |         |            |                   |                                                     |                                                                 |
| cluster 2  | KL198004.1         | Terpene                           | 1791615                                                  | 1800958 |            |                   |                                                     |                                                                 |
|            |                    |                                   |                                                          |         | KDQ33083   | 309               | terpenoid synthase                                  | 42%, XP_007383857.1, [Punctularia strigosozonata HHB-11173 SS5] |
|            |                    |                                   |                                                          |         | KDQ33084   | 265               | hypothetical protein                                | 55%, KIM48617.1, Hebeloma cylindrosporium h7]                   |
|            |                    |                                   |                                                          |         | KDQ33085   | 178               | COX4 subunit of cytochrome c oxidase                | 65%, RDB23043.1, Hypsizygus marmoreus                           |
| KDQ33086   | 363                | Clavamate synthase-like protein   | 57%, PCH44472.1, Wolfiporia cocos MD-104 SS10            |         |            |                   |                                                     |                                                                 |
| clusster 3 | KL198005.1         | Terpene                           | 580839                                                   | 613276  |            |                   |                                                     |                                                                 |
|            |                    |                                   |                                                          |         | KDQ31819   | 587               | SAICAR synthase-like protein                        | 64%, OSD04954.1, [Trametes coccinea BRFM310]                    |
|            |                    |                                   |                                                          |         | KDQ31820   | 1372              | Brefeldin A resistance protein                      | 71%, RDB27068.1, [Hypsizygus marmoreus]                         |
|            |                    |                                   |                                                          |         | KDQ31821   | 734               | pre-mrna-splicing factor clf1                       | 85%, GAW03472.1, [Lentinula edodes]                             |
|            |                    |                                   |                                                          |         | KDQ31822   | 761               | ATP-dependent RNA helicase MAK5                     | 59%, RDB29879.1, [Hypsizygus marmoreus]                         |
|            |                    |                                   |                                                          |         | KDQ31823   | 828               | major facilitator superfamily MFS-1                 | 61%, Armillaria gallica]                                        |
|            |                    |                                   |                                                          |         | KDQ32461   | 341               | terpenoid synthase                                  | 77%, PBK90173.1, [Moniliophthora roleri MCA 2997]               |
|            |                    |                                   |                                                          |         | KDQ31824   | 457               | glycosyltransferase family 32 protein               | 73%, XP_001881036.1, [Laccaria bicolor S238N-H82]               |
| KDQ31825   | 156                | hypothetical protein              | 56%, EGO03782.1, [Serpula lacrymans var. lacrymans S7.3] |         |            |                   |                                                     |                                                                 |
| clusster 4 | KL198006.1         | Terpene                           | 1236848                                                  | 1268155 |            |                   |                                                     |                                                                 |
|            |                    |                                   |                                                          |         | KDQ30320   | 313               | hypothetical protein                                | 37%, KIJ35026.1, Sphaerobolus stellatus SS14                    |
|            |                    |                                   |                                                          |         | KDQ30321   | 238               | lysophospholipase I                                 | 59%, XP_001837487.1, Coprinopsis cinerea okayama7#130           |
|            |                    |                                   |                                                          |         | KDQ30322   | 384               | oxysterol binding protein                           | 77%, ESK95501.1, Moniliophthora roleri MCA 2997                 |
|            |                    |                                   |                                                          |         | KDQ30323   | 2084              | hypothetical protein Hypma_015013                   | 51%, RDB29315.1, Hypsizygus marmoreus                           |
|            |                    |                                   |                                                          |         | KDQ30324   | 594               | Histone-lysine N-methyltransferase                  | 56%, RDB28649.1, Hypsizygus marmoreus                           |
|            |                    |                                   |                                                          |         | KDQ30325   | 306               | hypothetical protein                                | 31%, KDQ30319.1, Pleurotus ostreatus PC15                       |
|            |                    |                                   |                                                          |         | KDQ30326   | 168               | hypothetical protein                                | No similar protein                                              |
|            |                    |                                   |                                                          |         | KDQ30327   | 60                | XRE family transcriptional regulator                | 33%, WP_086684334.1, Streptomyces pseudogriseolus               |
|            |                    |                                   |                                                          |         | KDQ30328   | 317               | terpenoid synthase                                  | 51%, XP_007383857.1, Punctularia strigosozonata HHB-11173 SS5   |
|            |                    |                                   |                                                          |         | KDQ30329   | 148               | hypothetical protein                                | 72%, KDQ54035.1, Jaapia argillacea MUCL 33604                   |
|            |                    |                                   |                                                          |         | KDQ30330   | 703               | Actin-like protein arp5                             | 75%, RDB28997.1, Hypsizygus marmoreus                           |
|            |                    |                                   |                                                          |         | KDQ30331   | 207               | putative SEC4-like Rab/GTPase                       | 90%, KZP30398.1, Fibularhizoctonia sp. CBS 109695               |

|           |            |                                                          |                                                      |         |            |            |                                                          |                                                               |         |          |     |                                                           |                                                |
|-----------|------------|----------------------------------------------------------|------------------------------------------------------|---------|------------|------------|----------------------------------------------------------|---------------------------------------------------------------|---------|----------|-----|-----------------------------------------------------------|------------------------------------------------|
| cluster 5 | KL198007.1 | Terpene                                                  | 2979039                                              | 2996202 | KDQ29683.1 | 415        | NAD(P)FAD-dependent oxidoreductase                       | 60%, WP_117332655.1, Paraburkholderia sp. DHOC27              |         |          |     |                                                           |                                                |
|           |            |                                                          |                                                      |         | KDQ29913.1 | 372        | hypothetical magnesium transporter, CorA-like protein    | 86%, XP_001876532.1, Laccaria bicolor S238N-H82               |         |          |     |                                                           |                                                |
|           |            |                                                          |                                                      |         | KDQ29684.1 | 551        | thiamin biosynthesis protein                             | 59%, XP_001837535.1, Coprinopsis cinerea okayama7#130         |         |          |     |                                                           |                                                |
|           |            |                                                          |                                                      |         | KDQ29685.1 | 307        | terpenoid synthase                                       | 38%, OAX36101.1, Rhizopogon vinicolor AM-OR11-026             |         |          |     |                                                           |                                                |
|           |            |                                                          |                                                      |         | KDQ29686.1 | 395        | Mitochondrial distribution and morphology protein 34     | 64%, KNZ76017.1, Termitomyces sp. J132                        |         |          |     |                                                           |                                                |
|           |            |                                                          |                                                      |         | KDQ29687.1 | 904        | hypothetical protein K443DRAFT_95611                     | 54%, KIK03142.1, Laccaria amethystina LaAM-08-1               |         |          |     |                                                           |                                                |
|           |            |                                                          |                                                      |         | KDQ29688.1 | 328        | phosphoribosylaminoimidazole-succinocarboxamide synthase | 70%, XP_007388959.1, Punctularia strigosozonata HHB-11173 SS5 |         |          |     |                                                           |                                                |
|           |            |                                                          |                                                      |         | KDQ29689.1 | 202        | hypothetical protein                                     | 33%, RFN51705.1, Fusarium sp. FIESC_12                        |         |          |     |                                                           |                                                |
|           |            |                                                          |                                                      |         | cluster 6  | KL198007.1 | Terpene                                                  | 3003230                                                       | 3036247 | KDQ29691 | 262 | Protein phosphatase inhibitor 2 (IPP-2)protein            | 51%, KEP54734.1, Rhizoctonia solani 123E       |
|           |            |                                                          |                                                      |         |            |            |                                                          |                                                               |         | KDQ29692 | 347 | related to MTD1-methylenetetrahydrofolate dehydrogenase C | 73%, SJL02443.1, Armillaria ostoyae            |
| KDQ29693  | 827        | vesicular-fusion protein sec18                           | 74%, GAW01008.1, Lentinula edodes                    |         |            |            |                                                          |                                                               |         |          |     |                                                           |                                                |
| KDQ29694  | 346        | terpenoid synthase                                       | 55%, XP_007868800.1, Gloeophyllum trabeum ATCC 11539 |         |            |            |                                                          |                                                               |         |          |     |                                                           |                                                |
| KDQ29695  | 169        | Orn1 type endoplasmic reticulum protein                  | 76%, PBK66949.1, Armillaria solidipes                |         |            |            |                                                          |                                                               |         |          |     |                                                           |                                                |
| KDQ29696  | 250        | vacuolar membrane protein                                | 71%, GAW01014.1, Lentinula edodes                    |         |            |            |                                                          |                                                               |         |          |     |                                                           |                                                |
| KDQ29697  | 623        | UPF0652 protein                                          | 77%, KNZ76028.1, Termitomyces sp. J132               |         |            |            |                                                          |                                                               |         |          |     |                                                           |                                                |
| KDQ29698  | 614        | Tripeptidyl-peptidase sed3                               | 60%, RDB19145.1, Hypsizygus marmoreus                |         |            |            |                                                          |                                                               |         |          |     |                                                           |                                                |
| KDQ29699  | 405        | Eukaryotic translation initiation factor 3 subunit M     | 60%, RDB19879.1, Hypsizygus marmoreus                |         |            |            |                                                          |                                                               |         |          |     |                                                           |                                                |
| KDQ29700  | 472        | MFS general substrate transporter                        | 55%, PCH42368.1, Wolfiporia cocos MD-104 SS10        |         |            |            |                                                          |                                                               |         |          |     |                                                           |                                                |
| cluster 7 | KL198008.1 | Terpene                                                  | 3486503                                              | 3499654 | KDQ29701   | 499        | hypothetical protein Hypma_012032                        | 25%, RDB20806.1, Hypsizygus marmoreus                         |         |          |     |                                                           |                                                |
|           |            |                                                          |                                                      |         | KDQ29702   | 241        | E3 ubiquitin-protein ligase RNF13                        | 39%, KNZ72777.1, Termitomyces sp. J132                        |         |          |     |                                                           |                                                |
|           |            |                                                          |                                                      |         | KDQ29703   | 350        | Transcription initiation factor IIB                      | 87%, RDB19847.1, Hypsizygus marmoreus                         |         |          |     |                                                           |                                                |
|           |            |                                                          |                                                      |         | KDQ28499   | 371        | hypothetical protein                                     | 42%, KIM78294.1, Piloderma croceum F 1598                     |         |          |     |                                                           |                                                |
|           |            |                                                          |                                                      |         | KDQ28500   | 123        | glycoside hydrolase family 3 protein                     | 54%, XP_001878554.1, Laccaria bicolor S238N-H82               |         |          |     |                                                           |                                                |
|           |            |                                                          |                                                      |         | KDQ28501   | 337        | terpenoid synthase                                       | 35%, XP_007362402.1, Dichomitus squalens LYAD-421 SS1         |         |          |     |                                                           |                                                |
|           |            |                                                          |                                                      |         | KDQ28502   | 328        | hypothetical protein SCP_1502810                         | 39%, GBE89273.1, Sparassis crispa                             |         |          |     |                                                           |                                                |
|           |            |                                                          |                                                      |         | KDQ28503   | 312        | NAD(P)-binding protein                                   | 63%, PCH40180.1, Wolfiporia cocos MD-104 SS10                 |         |          |     |                                                           |                                                |
|           |            |                                                          |                                                      |         | cluster 8  | KL198009.1 | Terpene                                                  | 189432                                                        | 211568  | KDQ26324 | 350 | hypothetical protein                                      | no other similar protein                       |
|           |            |                                                          |                                                      |         |            |            |                                                          |                                                               |         | KDQ26325 | 209 | cytosine permease                                         | 32%, WP_079489404.1, Maledivibacter halophilus |
| KDQ26326  | 445        | Hercynylcysteine sulfoxide lyase                         | 57%, RDB27630.1, Hypsizygus marmoreus                |         |            |            |                                                          |                                                               |         |          |     |                                                           |                                                |
| KDQ26327  | 62         | small protein with six-cysteine motif-containing protein |                                                      |         |            |            |                                                          |                                                               |         |          |     |                                                           |                                                |
| KDQ26328  | 496        | squalene synthase                                        | 72%, PBL03238.1, Armillaria gallica                  |         |            |            |                                                          |                                                               |         |          |     |                                                           |                                                |
| KDQ26329  | 533        | Protein RCC2                                             | 69%, RDB27916.1, Hypsizygus marmoreus                |         |            |            |                                                          |                                                               |         |          |     |                                                           |                                                |
| KDQ26330  | 428        | Hercynylcysteine sulfoxide lyase                         | 56%, RDB27630.1, Hypsizygus marmoreus                |         |            |            |                                                          |                                                               |         |          |     |                                                           |                                                |
| KDQ26331  | 1365       | BTB/POZ domain-containing protein 1                      | 46%, OAX34336.1, Rhizopogon vinicolor AM-OR11-026    |         |            |            |                                                          |                                                               |         |          |     |                                                           |                                                |
| KDQ26332  | 343        | beta-lactamase/transpeptidase-like protein               | 52%, PBK65178, Armillaria solidipes                  |         |            |            |                                                          |                                                               |         |          |     |                                                           |                                                |

|            |             |                                    |                                                    |         |            |      |                                                            |                                                               |
|------------|-------------|------------------------------------|----------------------------------------------------|---------|------------|------|------------------------------------------------------------|---------------------------------------------------------------|
| cluster 9  | KL198009.1  | Terpene                            | 1413181                                            | 1436188 | KDQ26760   | 254  | hypothetical protein                                       | no other similar protein                                      |
|            |             |                                    |                                                    |         | KDQ26761   | 328  | terpenoid synthase                                         | 33%, XP_007385857.1, Punctularia strigosozonata HHB-11173 SS5 |
|            |             |                                    |                                                    |         | KDQ26762   | 305  | P34-Arc-domain-containing protein                          | 80%, KZP27392.1, Fibularhizoctonia sp. CBS 109695             |
|            |             |                                    |                                                    |         | KDQ26763   | 284  | NADPH-dependent methylglyoxal reductase GRE2               | 39%, KIM38281.1, Grifola frondosa                             |
|            |             |                                    |                                                    |         | KDQ26764   | 513  | hypothetical protein PHLGIDRAFT_287083                     | 44%, KIP02588.1, Phlebiopsis gigantea 11061_1 CR5-6           |
|            |             |                                    |                                                    |         | KDQ26765   | 174  | diaminohydroxyphosphoribosylamino-pyrimidine deaminase     | 70%, XP_007307627.1, Stereum hirsutum FP-91666 SS1            |
|            |             |                                    |                                                    |         | KDQ26766   | 357  | CAMK/CAMKL/GIN4 protein kinase                             | 69%, GAT46733.1, Mycena chlorophos                            |
|            |             |                                    |                                                    |         | KDQ26767   | 1026 | Polydeoxyribonucleotide synthase [ATP] 4                   | 70%, Q7Z7W5.1                                                 |
|            |             |                                    |                                                    |         | KDQ26768   | 901  | Forkhead box protein I3                                    | 43%, KXN86593.1, Leucoagaricus sp. SymC.cos                   |
|            |             |                                    |                                                    |         | KDQ26769   | 520  | hypothetical protein PILCRDRAFT_7602                       | 39%, KIM82689.1, Piloderma croceum F 1598                     |
| cluster 10 | KL1980010.1 | Terpene                            | 377075                                             | 409519  | KDQ25267   | 517  | putative monooxygenase                                     | 33%, XP_007321663.1, Serpula lacrymans var. lacrymans S7.9    |
|            |             |                                    |                                                    |         | KDQ25268   | 534  | squalene epoxidase/Squalene monooxygenase                  | 55%, ALJ76841.1, Taiwanofungus camphoratus                    |
|            |             |                                    |                                                    |         | KDQ25269   | 350  | hypothetical protein                                       | 28%, EJD40764.1, Auricularia subglabra TFB-10046 SS5          |
|            |             |                                    |                                                    |         | KDQ25270   | 733  | terpene synthase/Lanosterol synthase                       | 70%, XP_007870900.1, Gloeophyllum trabeum ATCC 11539          |
|            |             |                                    |                                                    |         | KDQ25271   | 406  | squalene synthase/farnesyl-diphosphate farnesyltransferase | 49%, PAV19342.1, Pyrrhoderma noxium                           |
|            |             |                                    |                                                    |         | KDQ25272   | 568  | putative monooxygenase                                     | 33%, XP_007321666.1, Serpula lacrymans var. lacrymans S7.9    |
|            |             |                                    |                                                    |         | KDQ25273   | 553  | subtilisin-like protein                                    | 56%, XP_007261610.1, Fomitiporia mediterranea MF3/22          |
|            |             |                                    |                                                    |         | KDQ25274   | 271  | S-adenosylmethionine transporter                           | 75%, OCH91648.1, Obba rivulosa                                |
|            |             |                                    |                                                    |         | KDQ25275   | 400  | putative tRNA-splicing endonuclease subunit sen54          | 50%, KNZ79720.1, Termitomyces sp. J132                        |
|            |             |                                    |                                                    |         | KDQ25276   | 214  | glycoside hydrolase family 61 protein                      | 68%, KEP47514.1, Rhizoctonia solani 123E                      |
| KDQ25277   | 242         | short chain oxidoreductase         | 55%, XP_007305294.1, Stereum hirsutum FP-91666 SS1 |         |            |      |                                                            |                                                               |
| KDQ25278   | 371         | Peroxisomal membrane protein PEX29 | 41%, OBZ68884.1, Grifola frondosa                  |         |            |      |                                                            |                                                               |
| cluster 11 | KL1980010.1 | Terpene                            | 1360621                                            | 1370113 | KDQ25605   | 234  | cyclin-like protein                                        | 58%, PBK97780.1                                               |
|            |             |                                    |                                                    |         | KDQ25606   | 354  | terpenoid synthase                                         | 34%, XP_007772031.1                                           |
|            |             |                                    |                                                    |         | KDQ25607   | 683  | Nuclear control of ATPase protein 2                        | 41%, RDB17868.1                                               |
|            |             |                                    |                                                    |         | KDQ25608   | 206  | hypothetical protein                                       | 38%, GAT60266.1                                               |
|            |             |                                    |                                                    |         | KDQ25609   | 405  | 26S proteasome subunit P45                                 | 93%, KZP05231.1                                               |
|            |             |                                    |                                                    |         | KDQ25610   | 197  | hypothetical protein                                       | no other similar protein                                      |
| cluster 12 | KL1980010.1 | Terpene                            | 1874217                                            | 1895254 | KDQ25806.1 | 341  | hypothetical protein STEHIDRAFT_168254                     | 42%, XP_007303762.1, Stereum hirsutum FP-91666 SS1            |
|            |             |                                    |                                                    |         | KDQ25807.1 | 529  | adenylate cyclase                                          | 42%, CUA69745.1, Rhizoctonia solani                           |
|            |             |                                    |                                                    |         | KDQ25808.1 | 476  | hypothetical protein K443DRAFT_676857                      | 40%, KIK03377.1, Laccaria amethystina LaAM-08-1               |
|            |             |                                    |                                                    |         | KDQ26263.1 | 360  | terpenoid synthase                                         | 75%, KZT27334.1, Neolentinus lepideus HHB14362 ss-1           |
|            |             |                                    |                                                    |         | KDQ25809.1 | 380  | leucine-rich repeat containing protein                     | 32%, EAY25202.1, Microscilla marina ATCC 23134                |
|            |             |                                    |                                                    |         | KDQ258010  | 166  | Serine/threonine-protein kinase PLK4                       | 60%, RDB17944.1, Hypsizygus marmoreus                         |

|            |             |         |         |         |            |      |                                                          |                                                               |
|------------|-------------|---------|---------|---------|------------|------|----------------------------------------------------------|---------------------------------------------------------------|
| cluster 13 | KL1980011.1 | Terpene | 1022162 | 1045821 |            |      |                                                          |                                                               |
|            |             |         |         |         | KDQ24516.1 | 501  | hypothetical protein A7U60_g7568                         | 24%, OCB85557.1, Sanghuangporus baumii                        |
|            |             |         |         |         | KDQ24517.1 | 268  | hypothetical protein GALMADRAFT_246490                   | 43%, KDR77205.1, Galerina marginata CBS 339.88                |
|            |             |         |         |         | KDQ24518.1 | 643  | DNA/RNA polymerase                                       | 55%, PBK75521.1, Armillaria solidipes                         |
|            |             |         |         |         | KDQ24519.1 | 659  | hypothetical protein Hypma                               | 42%, RDB26384.1, Hypsizygus marmoreus                         |
|            |             |         |         |         | KDQ24520.1 | 99   | Zinc finger HIT domain-containing protein 1              | 65%, RDB26081.1, Hypsizygus marmoreus                         |
|            |             |         |         |         | KDQ24521.1 | 910  | Cystathionine beta-lyase                                 | 73%, RDB26082.1, Hypsizygus marmoreus                         |
|            |             |         |         |         | KDQ25140.1 | 339  | terpenoid synthase                                       | 70%, PBL03761.1, Armillaria gallica                           |
|            |             |         |         |         | KDQ24522.1 | 208  | DNA-directed RNA polymerase RPB5 subunit                 | 84%, XP_007388983.1, Punctularia strigosozonata HHB-11173 SS5 |
|            |             |         |         |         | KDQ24523.1 | 246  | Select seq PCH42341.1 WD40 repeat-like protein           | 82%, PCH42341.1, Wolfiporia cocos MD-104 SS10                 |
|            |             |         |         |         | KDQ24524.1 | 260  | Increased recombination centers protein 22               | 60%, RDB26386.1, Hypsizygus marmoreus                         |
|            |             |         |         |         | KDQ24525.1 | 320  | class I glutamine amidotransferase-like protein          | 67%, KLO13044.1, Schizopora paradoxa                          |
| cluster 14 | KL1980011.1 | Terpene | 1246999 | 1273897 |            |      |                                                          |                                                               |
|            |             |         |         |         | KDQ24603.1 | 790  | AP-3 complex subunit beta-2                              | 61%, RDB31011.1, Hypsizygus marmoreus                         |
|            |             |         |         |         | KDQ24604.1 | 629  | Methyltransferase ausD                                   | 58%, RDB23458.1, Hypsizygus marmoreus                         |
|            |             |         |         |         | KDQ24605.1 | 1003 | calcofluor white hypersensitive protein                  | 61%, ESK82818.1, Monilophthora roreri MCA 2997                |
|            |             |         |         |         | KDQ24606.1 | 348  | COBW domain-containing protein C15D4.05                  | 67%, RDB31054.1, Hypsizygus marmoreus                         |
|            |             |         |         |         | KDQ24607.1 | 345  | terpenoid synthase                                       | 30%, XP_007772031.1, Coniophora puteana RWD-64-598 SS2        |
|            |             |         |         |         | KDQ24608.1 | 191  | hypothetical protein Hypma_016157                        | 48%, RDB14947.1, Hypsizygus marmoreus                         |
|            |             |         |         |         | KDQ24609.1 | 500  | Membrane protein TMS1                                    | 78%, RDB31006.1, Hypsizygus marmoreus                         |
|            |             |         |         |         | KDQ24610.1 | 1028 | WD40 repeat-like protein                                 | 51%, GBE80545.1, Sparassis crispa                             |
| cluster 15 | KL1980012.1 | Terpene | 1308937 | 1350261 |            |      |                                                          |                                                               |
|            |             |         |         |         | KDQ24002.1 | 205  | B-cell receptor-associated 31-like protein               | 69%, OAX32675.1, Rhizopogon vinicolor AM-OR11-026             |
|            |             |         |         |         | KDQ24003.1 | 626  | L-sorbose 1-dehydrogenase/glucose dehydrogenase          | 48%, RDB27735.1, Hypsizygus marmoreus                         |
|            |             |         |         |         | KDQ24004.1 | 324  | terpenoid synthase                                       | 41%, KIY51852.1, Fistulina hepatica ATCC 64428                |
|            |             |         |         |         | KDQ24005.1 | 514  | putative CyP450 monooxygenase                            | 94%, CAJ00405.1, Pleurotus sapidus                            |
|            |             |         |         |         | KDQ24006.1 | 504  | cytochrome P450                                          | 46%, PBK63697.1, Armillaria solidipes                         |
|            |             |         |         |         | KDQ24007.1 | 339  | hypothetical protein                                     | 51%, KIM79191.1, Piloderma croceum F 1598                     |
|            |             |         |         |         | KDQ24008.1 | 593  | GMC oxidoreductase/L-sorbose 1-dehydrogenase             | 49%, KIL63993.1, Amanita muscaria Koide BX008                 |
|            |             |         |         |         | KDQ24186.1 | 132  | NdufA6 NADH-ubiquinone oxidoreductase 14.8 kDa subunit   | 72%, OAX37719.1, Rhizopogon vinicolor AM-OR11-026             |
|            |             |         |         |         | KDQ24009.1 | 204  | casein kinase substrate phosphoprotein PP28 protein      | 59%, EUC64528.1, Rhizoctonia solani AG-3 Rh51AP               |
|            |             |         |         |         | KDQ24010.1 | 347  | Aldo-keto reductase yakc [NADP(+)]                       | 69%, RDB23525.1, Hypsizygus marmoreus                         |
|            |             |         |         |         | KDQ24011.1 | 582  | DUF1365-domain-containing protein                        | 52%, RDB23789.1, Hypsizygus marmoreus                         |
|            |             |         |         |         | KDQ24012.1 | 617  | hypothetical protein                                     | 38%, KIK38162.1, Suillus luteus UH-Slu-Lm8-n1                 |
|            |             |         |         |         | KDQ24013.1 | 633  | hypothetical protein                                     | 39%, ESK95859.1, Monilophthora roreri MCA 2997                |
|            |             |         |         |         | KDQ24014.1 | 225  | hypothetical protein                                     | 38%, RXI77973.1, Lactobacillus sp. BCRC 12945                 |
|            |             |         |         |         | KDQ24015.1 | 611  | Pyranose dehydrogenase/aryl-alcohol oxidase-like protein | 71%, RDB23531.1, Hypsizygus marmoreus                         |



|            |             |         |         |         |            |      |                                                           |
|------------|-------------|---------|---------|---------|------------|------|-----------------------------------------------------------|
| cluster 16 | KL1980012.1 | Terpene | 1749778 | 1765491 |            |      |                                                           |
|            |             |         |         |         | KDQ24136.1 | 208  | hypothetical protein                                      |
|            |             |         |         |         | KDQ24137.1 | 449  | glycoside hydrolase family 47                             |
|            |             |         |         |         | KDQ24138.1 | 407  | terpenoid synthase                                        |
|            |             |         |         |         | KDQ24139.1 | 273  | hypothetical protein                                      |
|            |             |         |         |         | KDQ24140.1 | 1024 | hypothetical protein                                      |
|            |             |         |         |         | KDQ24141.1 | 76   | hypothetical cold-regulated 413 plasma membrane protein 2 |
| cluster 17 | KL1980013.1 | Terpene | 618641  | 642045  |            |      |                                                           |
|            |             |         |         |         | KDQ23215.1 | 197  | ste ste20 ysk protein kinase                              |
|            |             |         |         |         | KDQ23216.1 | 500  | aldehyde dehydrogenase                                    |
|            |             |         |         |         | KDQ23217.1 | 514  | cytochrome P450 monooxygenase 65                          |
|            |             |         |         |         | KDQ23218.1 | 195  | terpenoid synthase                                        |
|            |             |         |         |         | KDQ23219.1 | 596  | alcohol oxidase                                           |
|            |             |         |         |         | KDQ23220.1 | 278  | GTP-binding protein                                       |
|            |             |         |         |         | KDQ23221.1 | 111  | Sulfoacetaldehyde acetyltransferase                       |
|            |             |         |         |         | KDQ23222.1 | 803  | ubiquitin carboxyl-terminal hydrolase 14                  |
|            |             |         |         |         | KDQ23223.1 | 630  | actin-like ATPase domain-containing protein               |
|            |             |         |         |         |            |      | 41%, KDR82944.1, Galerina marginata CBS 339.88            |
|            |             |         |         |         |            |      | 59%, KZP30628.1, Fibularhizoctonia sp. CBS 109695         |
|            |             |         |         |         |            |      | 53%, PBK67540.1, Armillaria solidipes                     |
|            |             |         |         |         |            |      | 33%, XP_027620911.1, Sparassis crispa                     |
|            |             |         |         |         |            |      | 44%, XP_024334700.1, Postia placenta MAD-698-R-SB12       |
|            |             |         |         |         |            |      | 33%, XP_010690970.1, Beta vulgaris subsp. vulgaris        |
|            |             |         |         |         |            |      | 36%, ESK94320.1, Moniliophthora roreri MCA 2997           |
|            |             |         |         |         |            |      | 74%, GAW04170.1, Lentinula edodes                         |
|            |             |         |         |         |            |      | 37%, XP_009553326.1, Heterobasidion irregulare TC 32-1    |
|            |             |         |         |         |            |      | 39%, KZT73357.1, Daedalea quercina L.-15889               |
|            |             |         |         |         |            |      | 47%, KZV83135.1, Exidia glandulosa HHB12029               |
|            |             |         |         |         |            |      | 49%, KZP07191.1, ibularhizoctonia sp. CBS 109695          |
|            |             |         |         |         |            |      | 37%, VDC32956.1, Xinfangfangia sp. CIP 111625             |
|            |             |         |         |         |            |      | 70%, KZT00902.1, Laetiporus sulphureus 93-53              |
|            |             |         |         |         |            |      | 65%, GAW05934.1, Lentinula edodes                         |

Note: The proteins in red color indicates they are oxidases, and the proteins marked with yellow indicates they are terpene synthases.

**Table S4.** Comparison of genes expression of cluster 15 and cluster 17 between the co-culture and mono-culture of *P. ostreatus*. Data were acquired from three independent biological replicates.

| Protein ID        | Description                                            | MPleos<br>readcount | MPleos<br>FPKM | Cpleos<br>readcount | Cpleos<br>FPKM | Fold<br>change |
|-------------------|--------------------------------------------------------|---------------------|----------------|---------------------|----------------|----------------|
| <b>Cluster 15</b> |                                                        |                     |                |                     |                |                |
| KDQ24002          | B-cell receptor-associated 31-like protein             | 1325                | 12.9           | 2232                | 23.1           | 1.68           |
| KDQ24003          | L-sorbose 1-dehydrogenase                              | 1325                | 12.9           | 2232                | 23.1           | 1.68           |
| <b>KDQ24004</b>   | <b>terpenoid synthase</b>                              | <b>1325</b>         | <b>12.9</b>    | <b>2232</b>         | <b>23.1</b>    | <b>1.68</b>    |
| KDQ24005          | putative CYP450 monooxygenase                          | 405                 | 10.9           | 411                 | 11.4           | 1.01           |
| <b>KDQ24006</b>   | <b>cytochrome P450</b>                                 | <b>2704</b>         | <b>29</b>      | <b>1806</b>         | <b>19.9</b>    | <b>0.66</b>    |
| KDQ24007          | hypothetical protein                                   | 2704                | 29             | 1806                | 19.9           | 0.66           |
| KDQ24008          | GMC oxidoreductase                                     | 3349                | 63.7           | 1201                | 23.5           | 0.36           |
| KDQ24186          | NdufA6 NADH-ubiquinone oxidoreductase 14.8 kDa subunit | 815                 | 38.13          | 580                 | 28.2           | 0.71           |
| KDQ24009          | casein kinase substrate phosphoprotein PP28 protein    | 2941                | 54.3           | 2571                | 50.1           | 0.87           |
| KDQ24010          | Aldo-keto reductase                                    | 559                 | 176.9          | 314                 | 96.6           | 0.56           |
| KDQ24011          | DUF1365-domain-containing protein                      | 5914                | 81.2           | 1626                | 22.8           | 0.27           |
| <b>Cluster 17</b> |                                                        |                     |                |                     |                |                |
| KDQ23215          | ste ste20 ysk protein kinase                           | 115                 | 2.1            | 141                 | 2.68           | 1.23           |
| KDQ23216          | aldehyde dehydrogenase                                 | 1587                | 20.04          | 539                 | 7.08           | 0.34           |
| <b>KDQ23217</b>   | <b>cytochrome P450 monooxygenase</b>                   | <b>ND</b>           | <b>ND</b>      | <b>ND</b>           | <b>ND</b>      |                |
| <b>KDQ23218</b>   | <b>terpenoid synthase</b>                              | <b>660</b>          | <b>13.01</b>   | <b>893</b>          | <b>18.71</b>   | <b>1.35</b>    |
| KDQ23219          | GMC oxidoreductase/alcohol oxidase                     | 660                 | 13.01          | 893                 | 18.71          | 1.35           |
| KDQ23220          | GTP-binding protein                                    | 727                 | 32.9           | 426                 | 20.22          | 0.59           |
| KDQ23221          | Sulfoacetaldehyde acetyltransferase                    | ND                  | ND             | ND                  | ND             |                |
| KDQ23222          | ubiquitin carboxyl-terminal hydrolase 14               | 726                 | 9.35           | 934                 | 12.55          | 1.28           |
| KDQ23223          | actin-like ATPase domain-containing protein            | 2181                | 51.4           | 1521                | 37.88          | 0.69           |

Note: MPleos and Cpleos stand for the mono-culture and the co-culture, respectively.

Bold label means that genes expression was confirmed by subsequent qRT-PCR analysis.

ND stands for not detected.

Diameter of inhibition zone  $\geq 16\text{mm}$

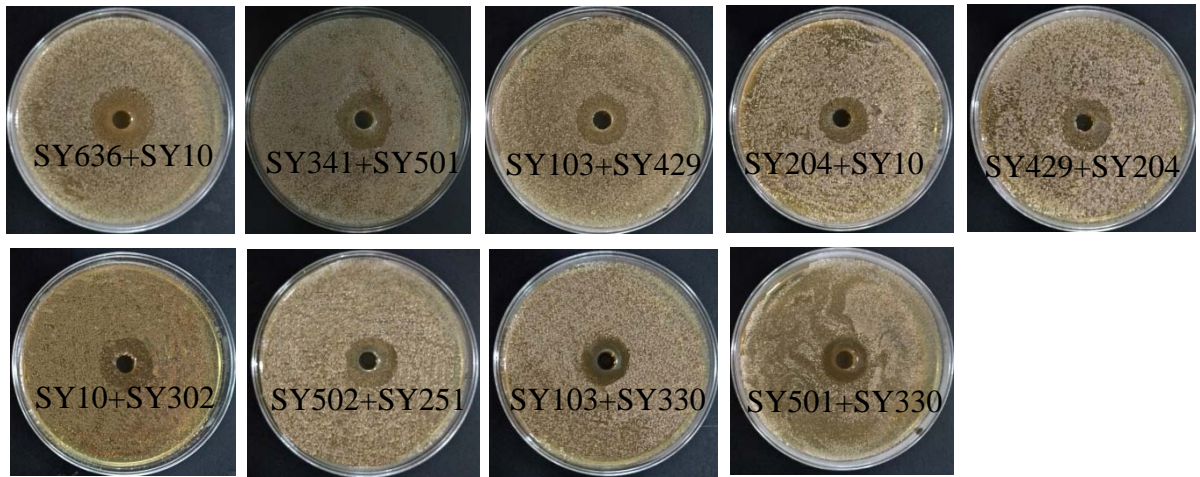

$7 \leq$  Diameter of inhibition zone  $\leq 15 \text{ mm}$

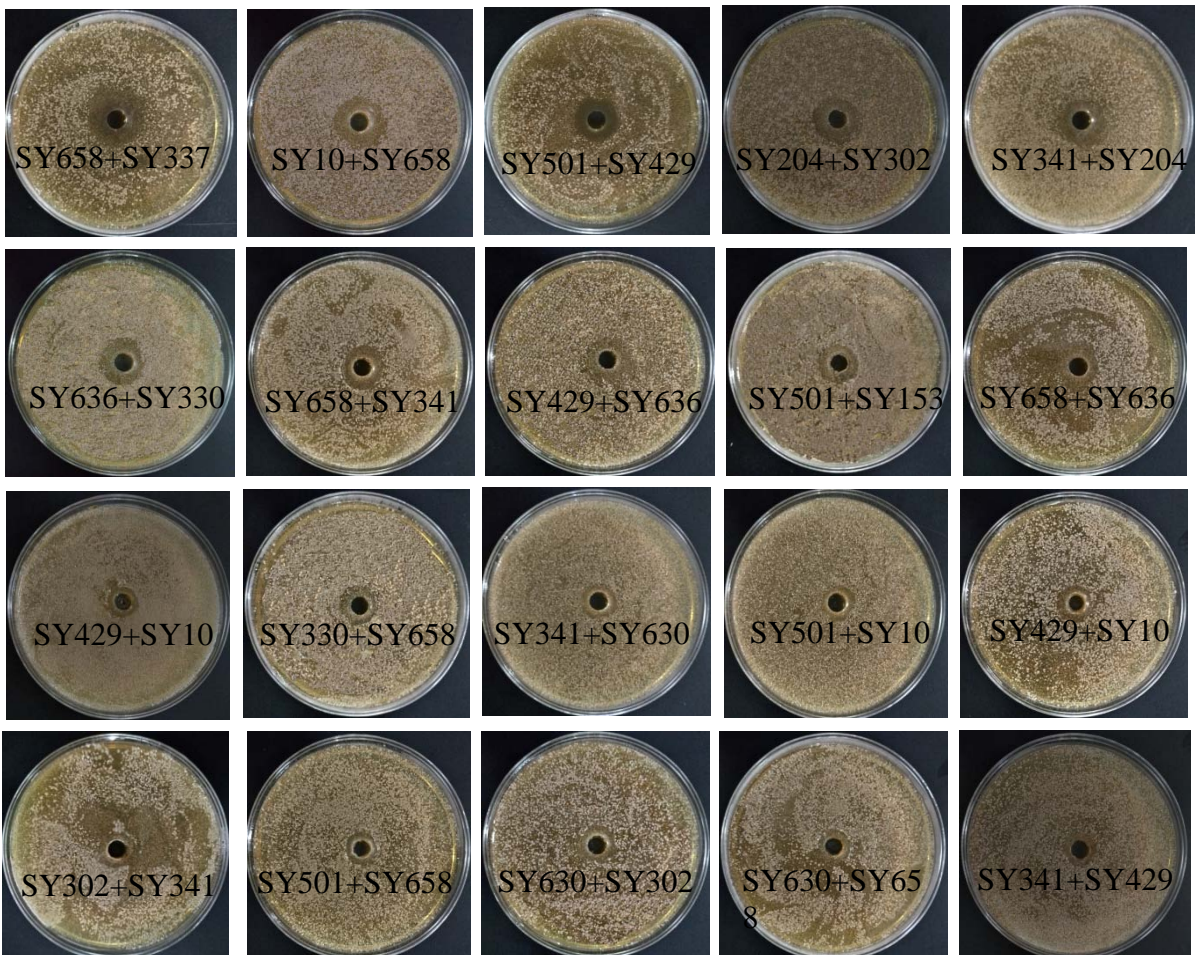

**Figure S1** Agar diffusion test to screen out an appropriate co-culture system for efficiently inhibiting the growth of *C. albicans* and *C. neoformans*. The results of *C. neoformans* are not shown for brevity.

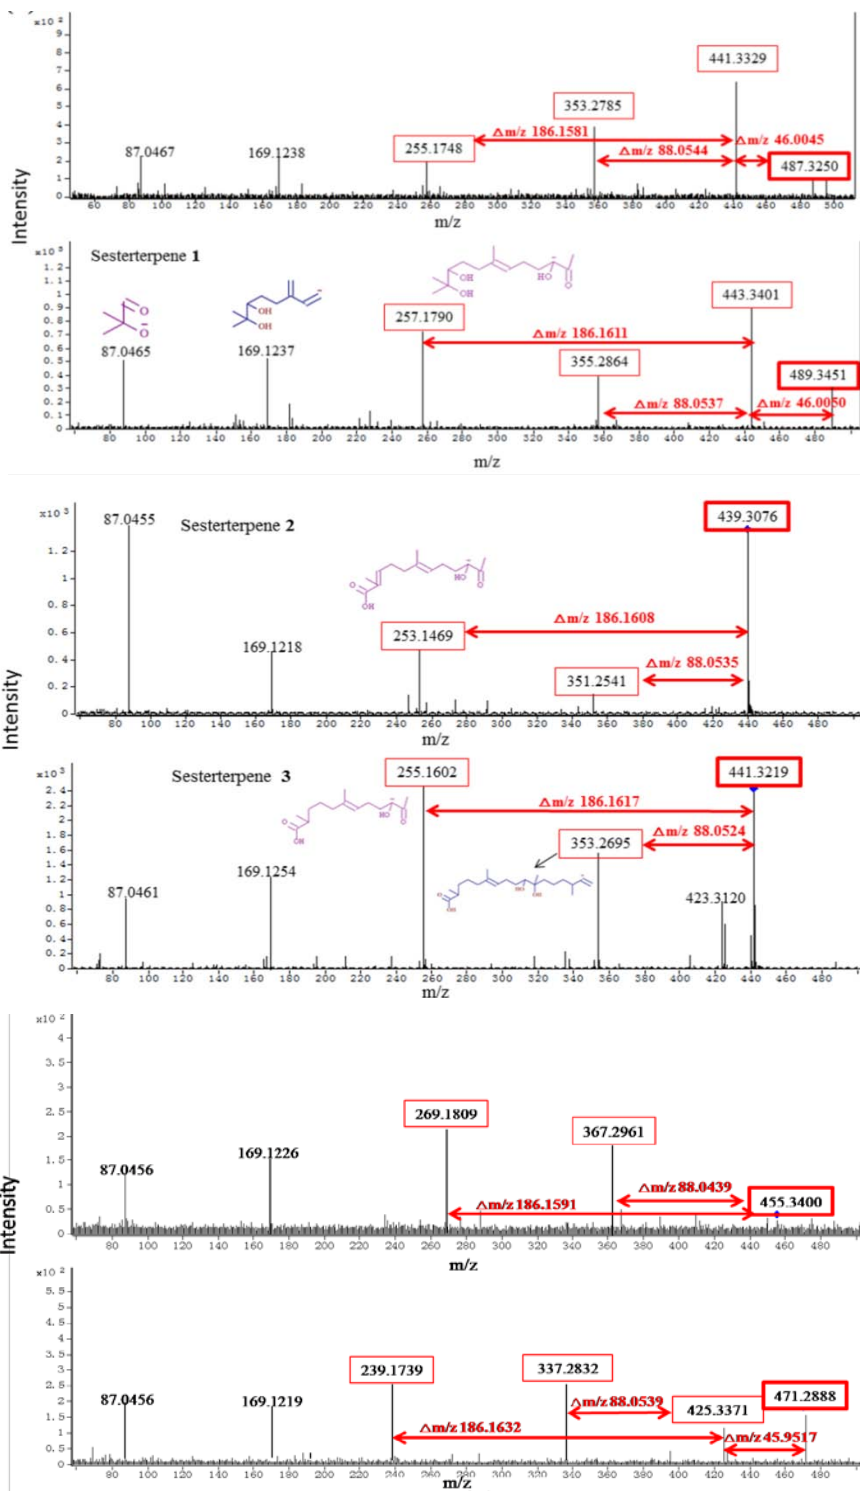

Figure S2 MS/MS spectra of induced sesterterpene derivatives.

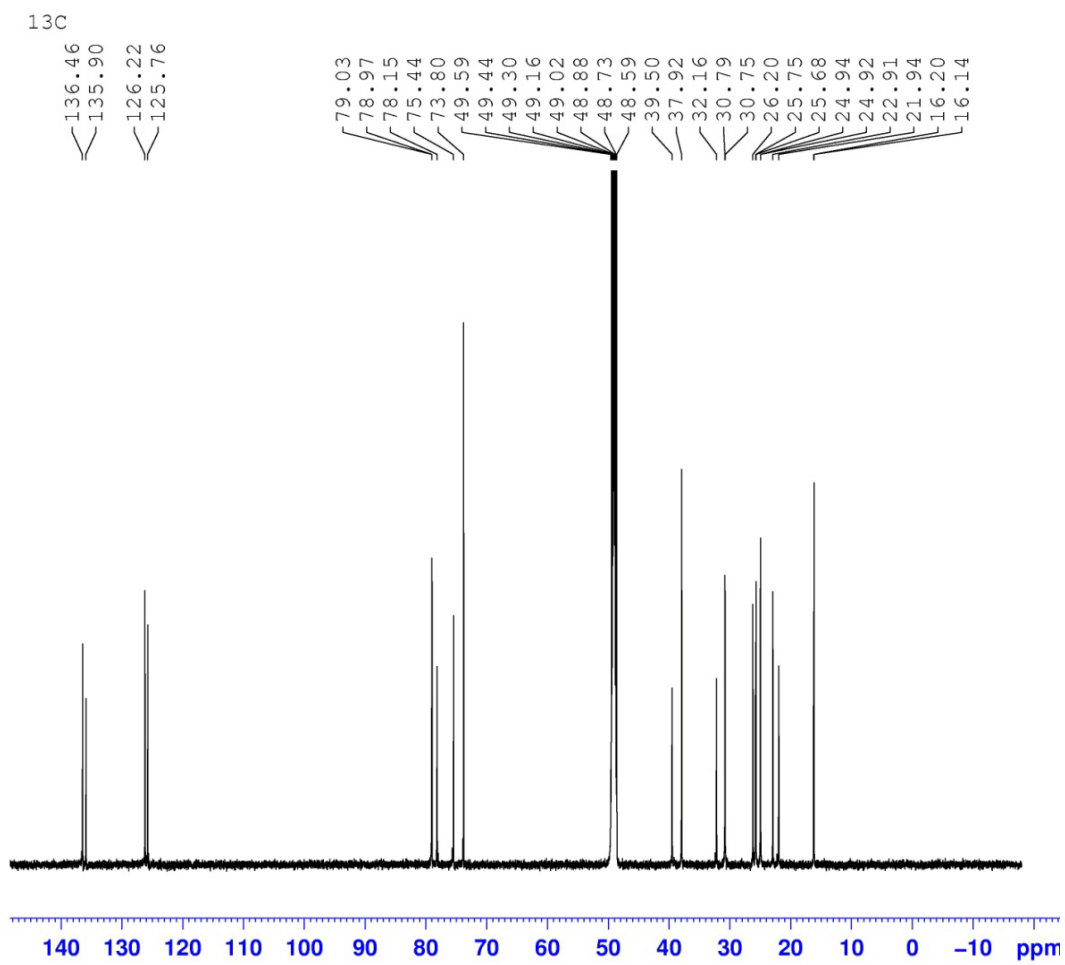

**Figure S3A** <sup>13</sup>C-spectrum of sesterterpene **1** (methanol)

<sup>13</sup>C NMR

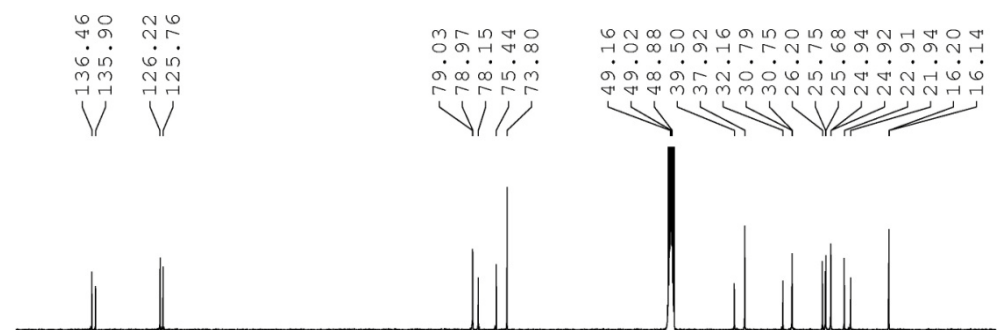

DEPT 90

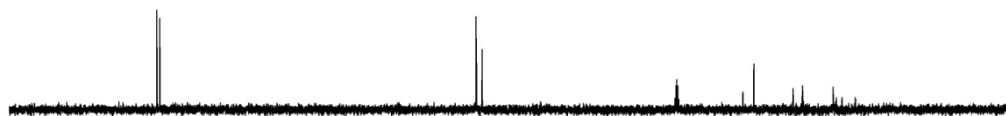

DEPT 135

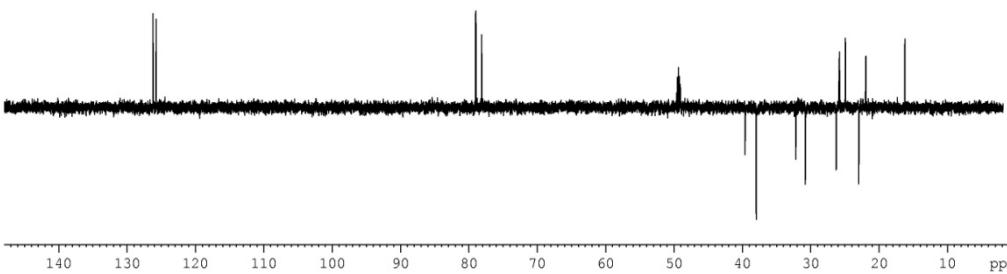

**Figure S3B** DEPT90° and DEPT135° spectrum of sesterterpene **1**

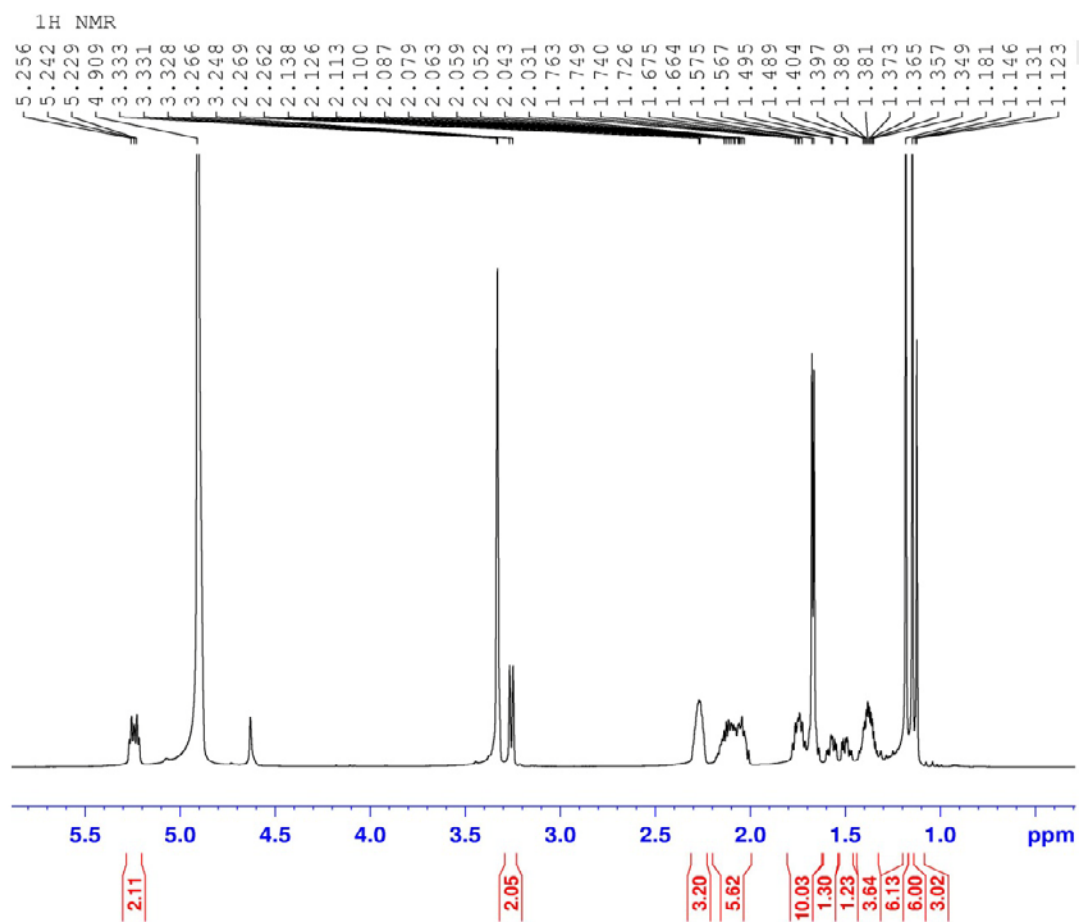

Figure S3C <sup>1</sup>H-spectrum of sesterterpene 1

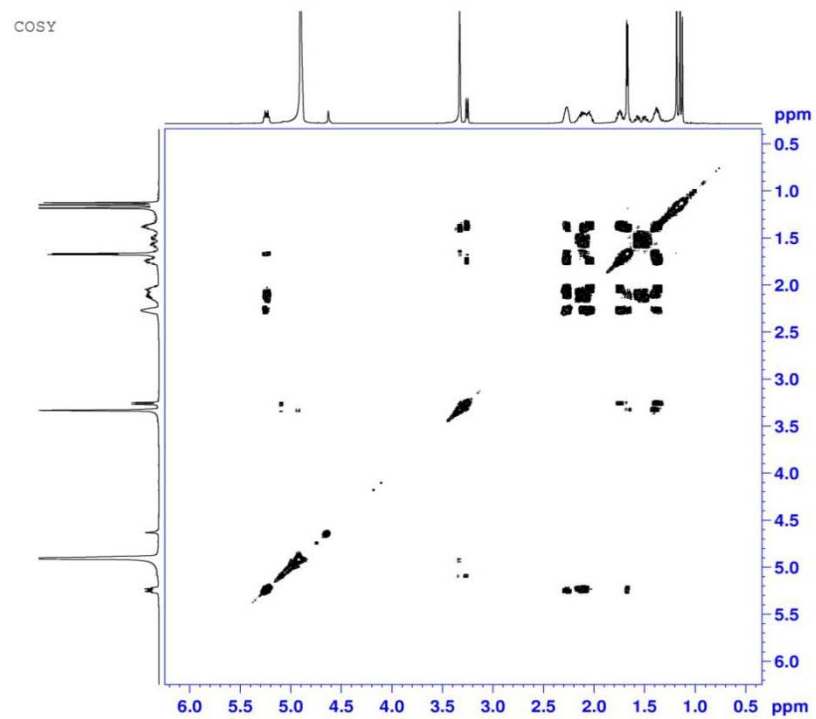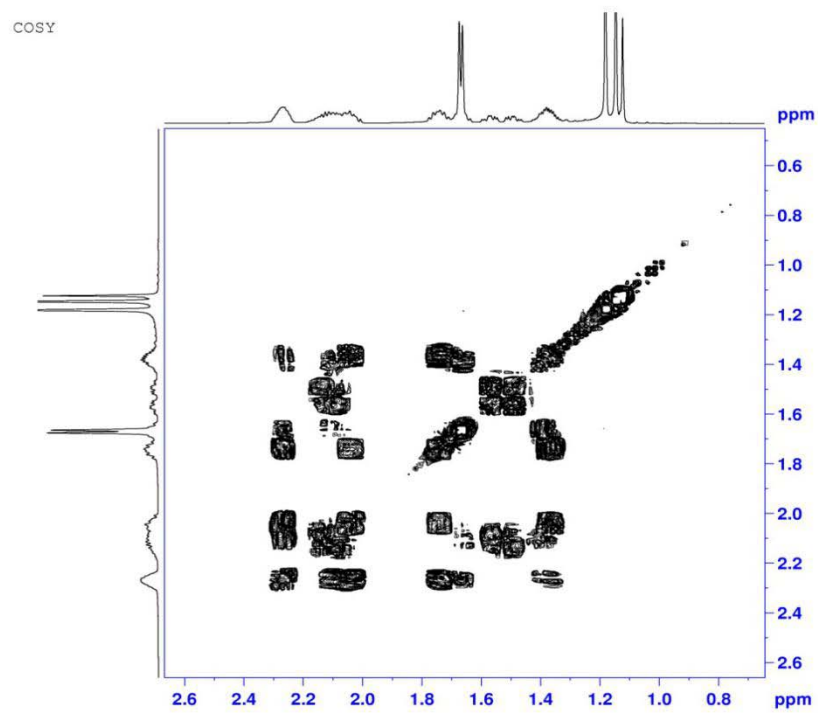

**Figure S3D** COSY spectrum of sesterterpene **1**



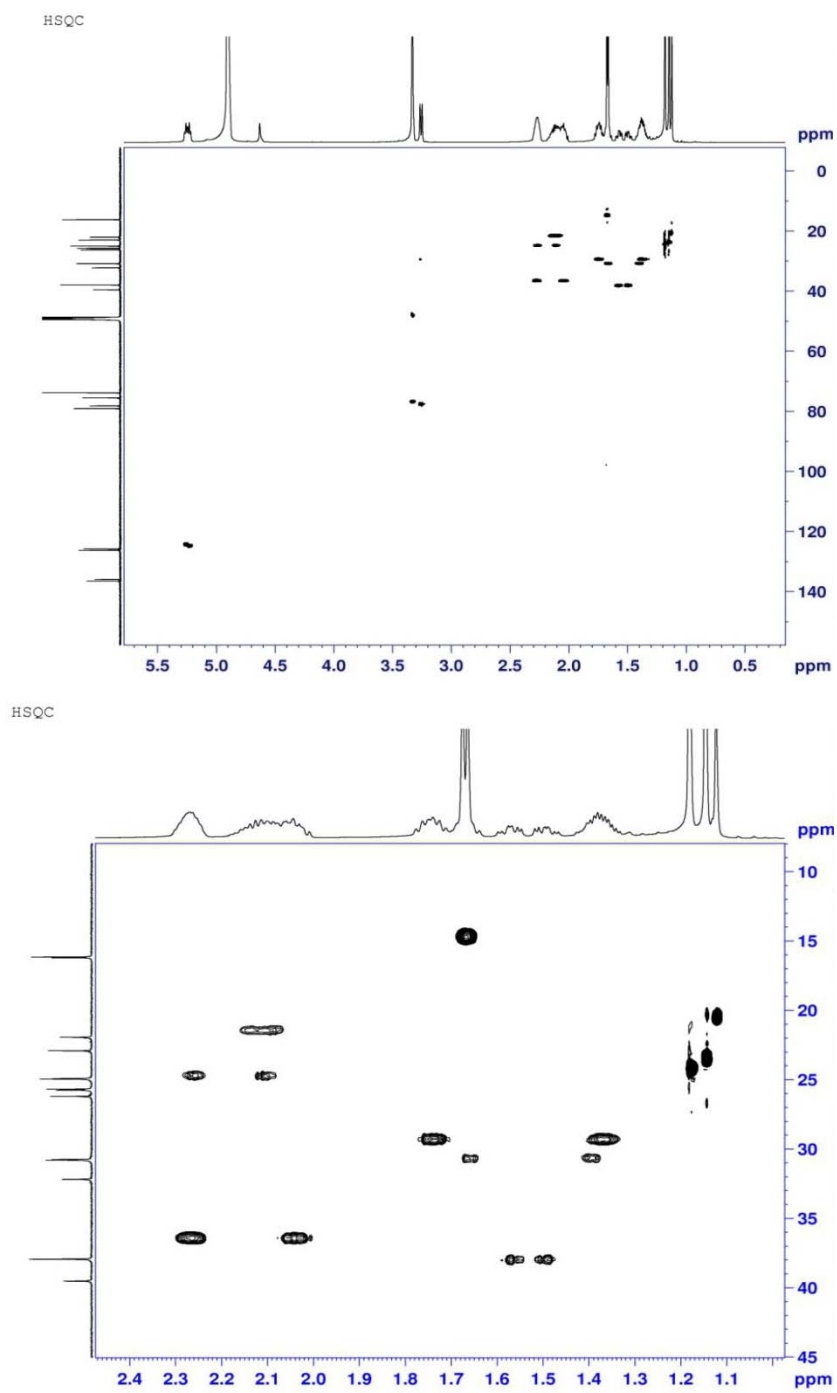

**Figure S3E** HSQC spectrum of sesterterpene **1**

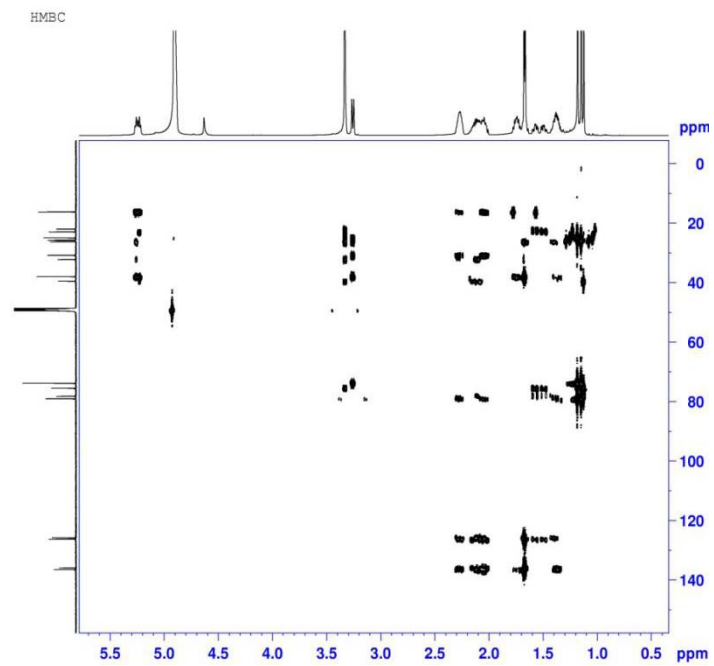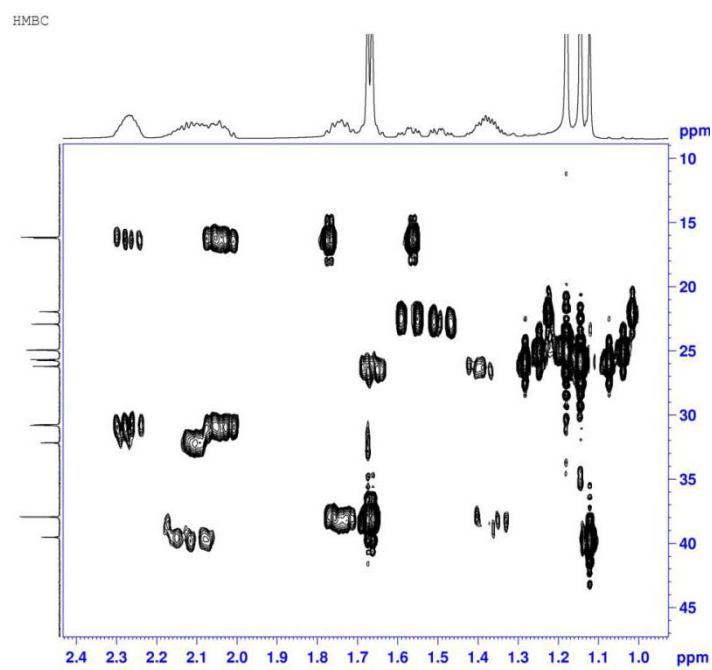

**Figure S3F** HMBC spectrum of sesterterpene **1**

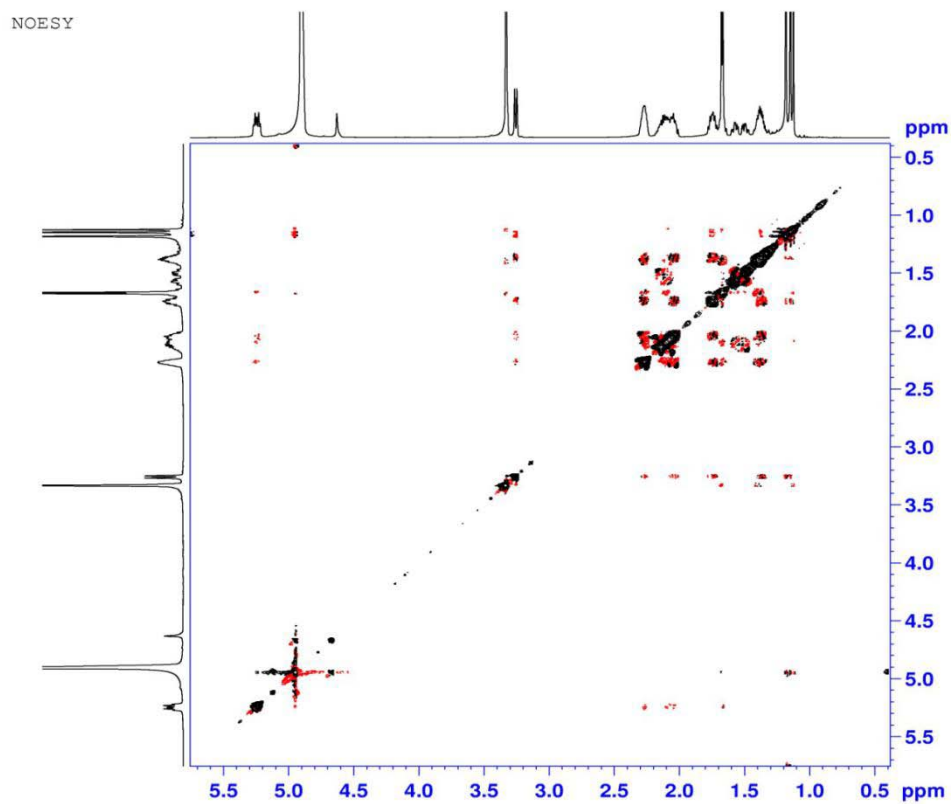

**Figure S3G** NOESY spectrum of sesterterpene **1**

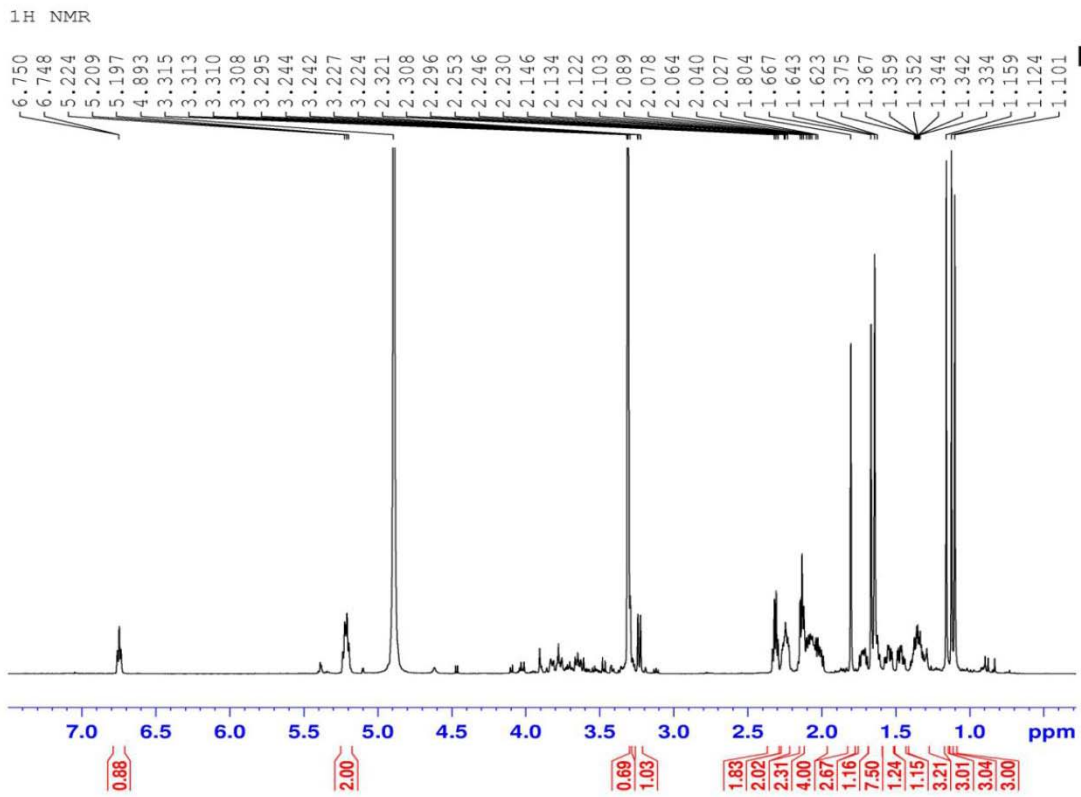

Figure S3H <sup>1</sup>H-spectrum of sesterterpene 2

$^{13}\text{C}$  NMR AV III 600 in MeOD 439

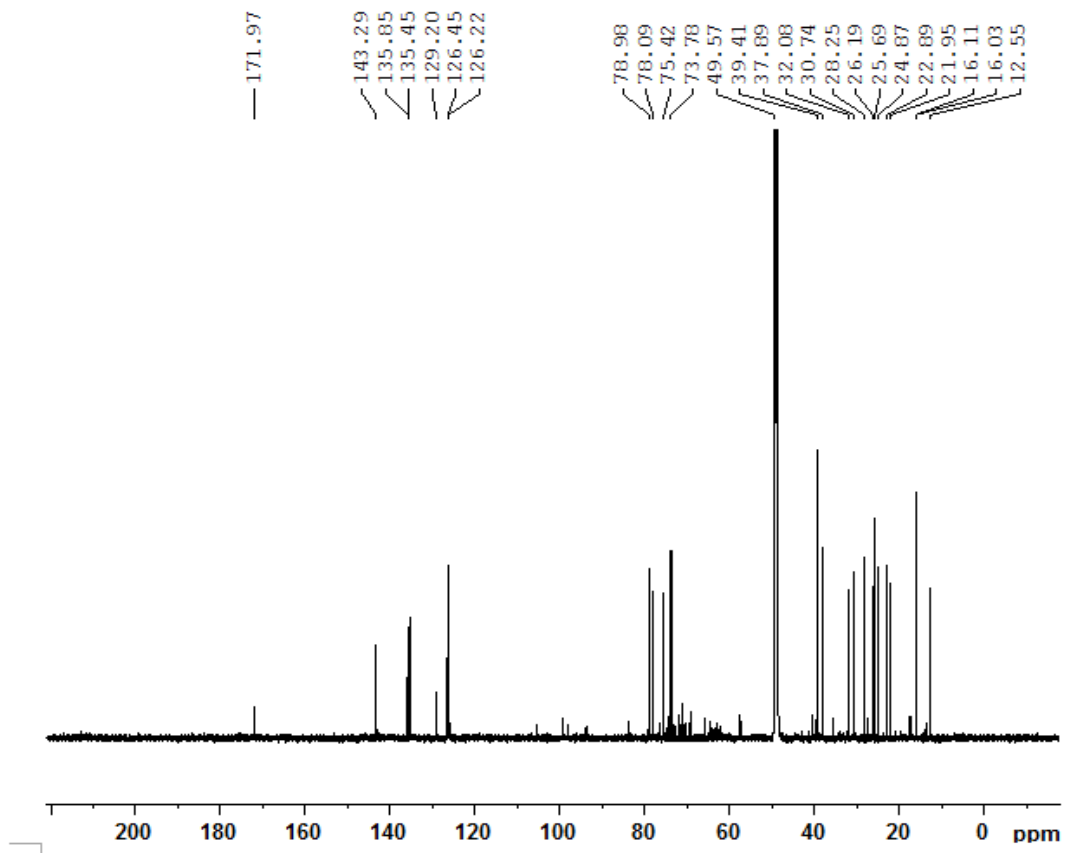

Figure S31  $^{13}\text{C}$ -spectrum of sesterterpene 2

13C NMR AV III 600 in MeOD 439

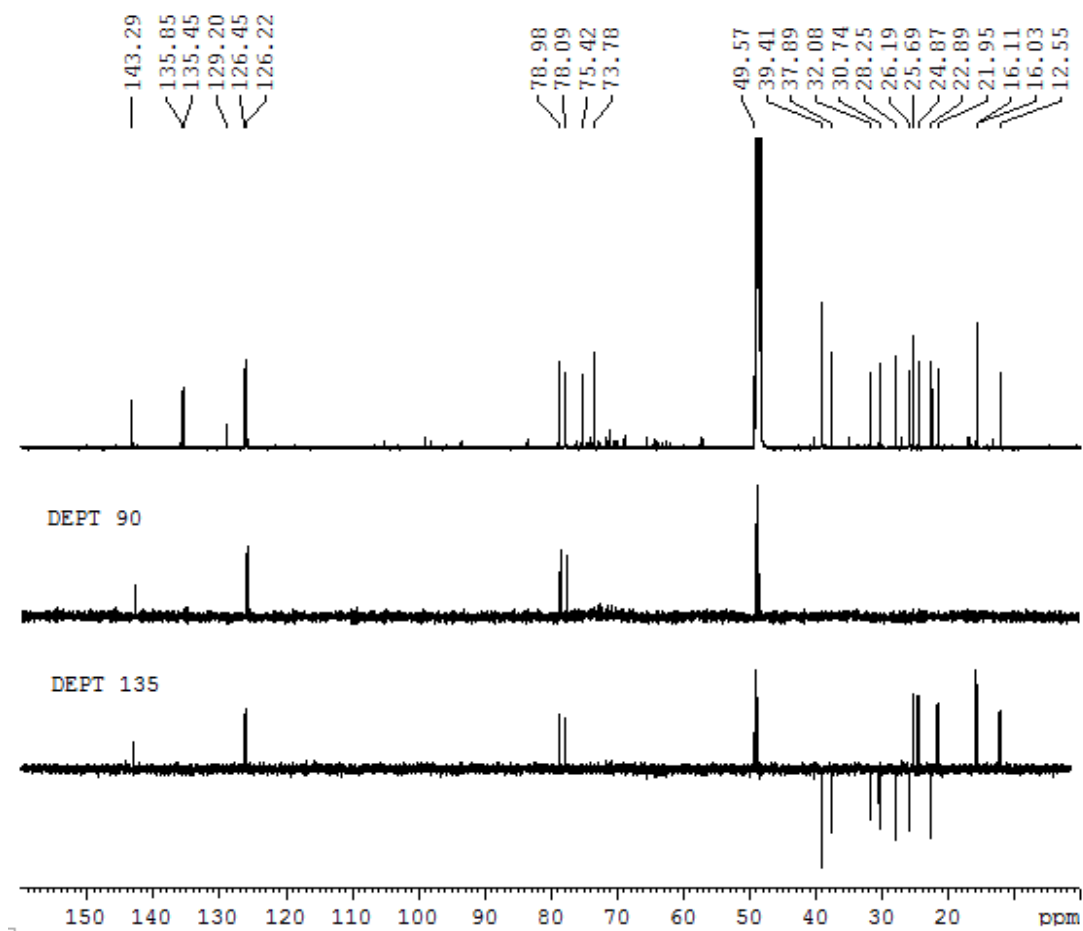

Figure S3J DEPT90° and DEPT135° spectrum of sesterterpene 2

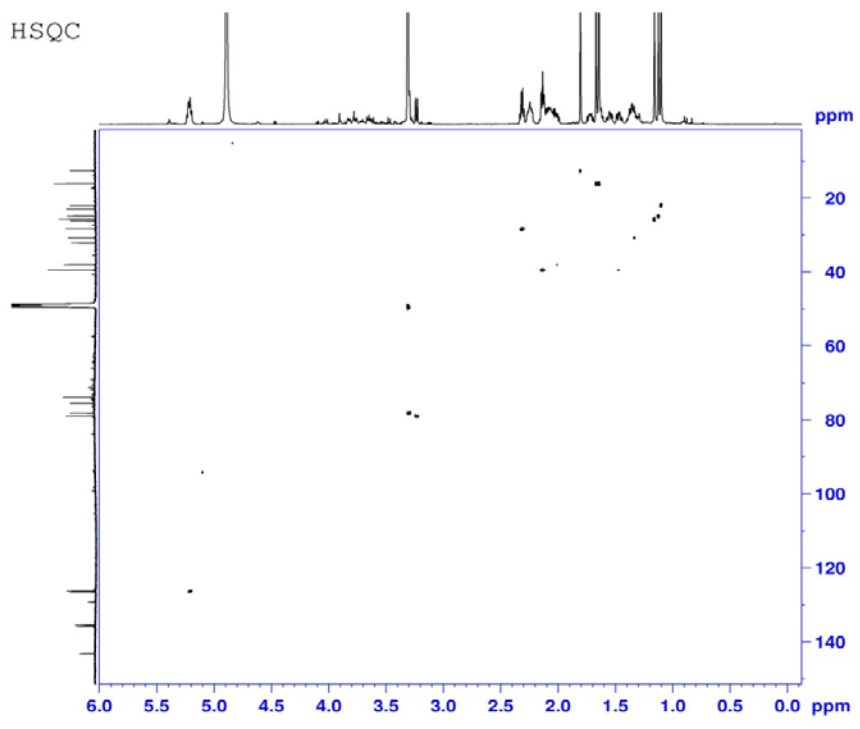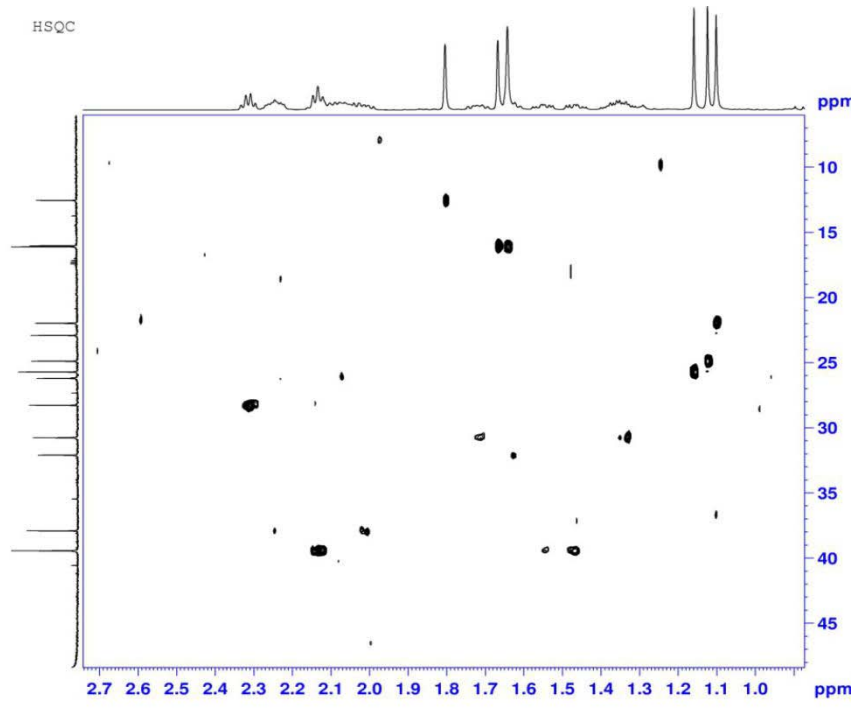

**Figure S3K** HSQC spectrum of sesterterpene 2

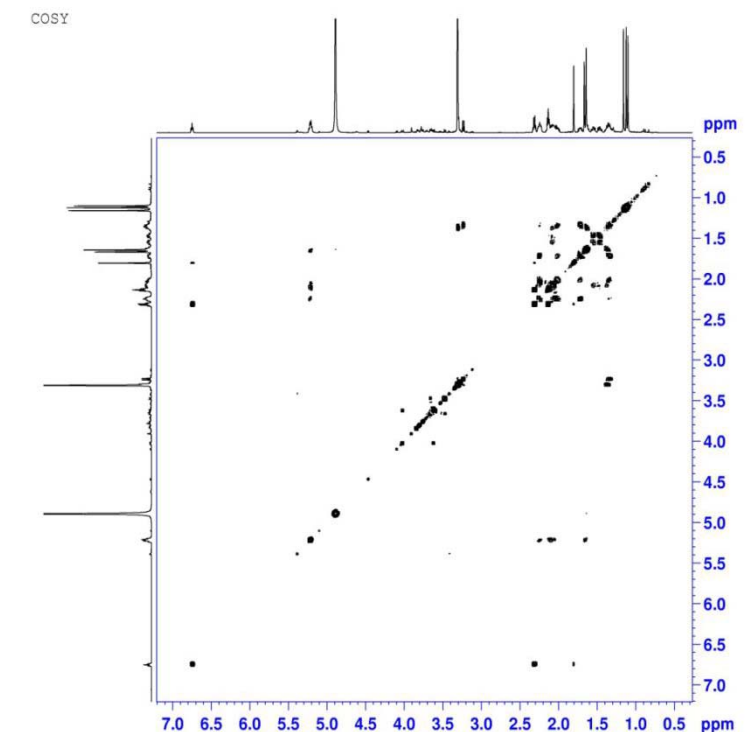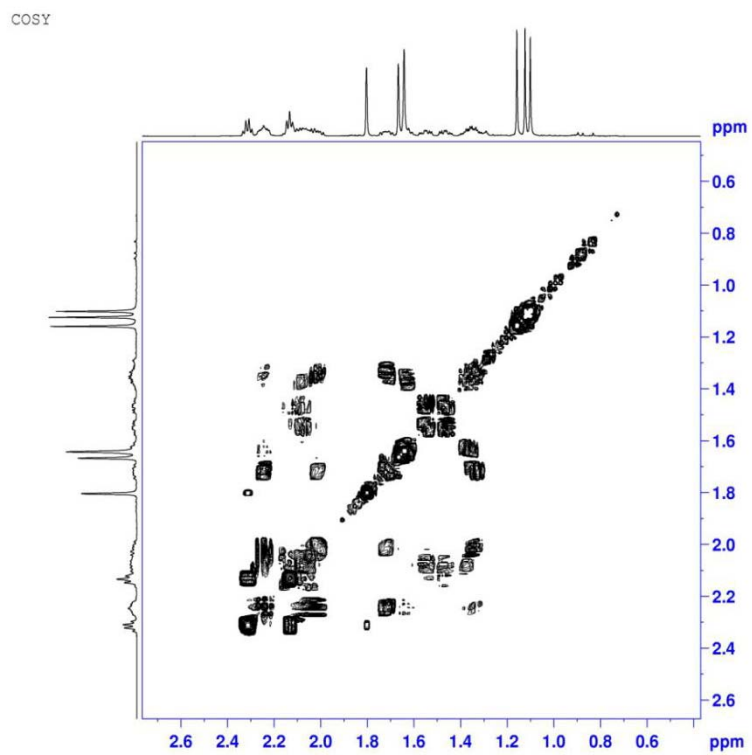

**Figure S3L** COSY spectrum of sesterterpene **2**



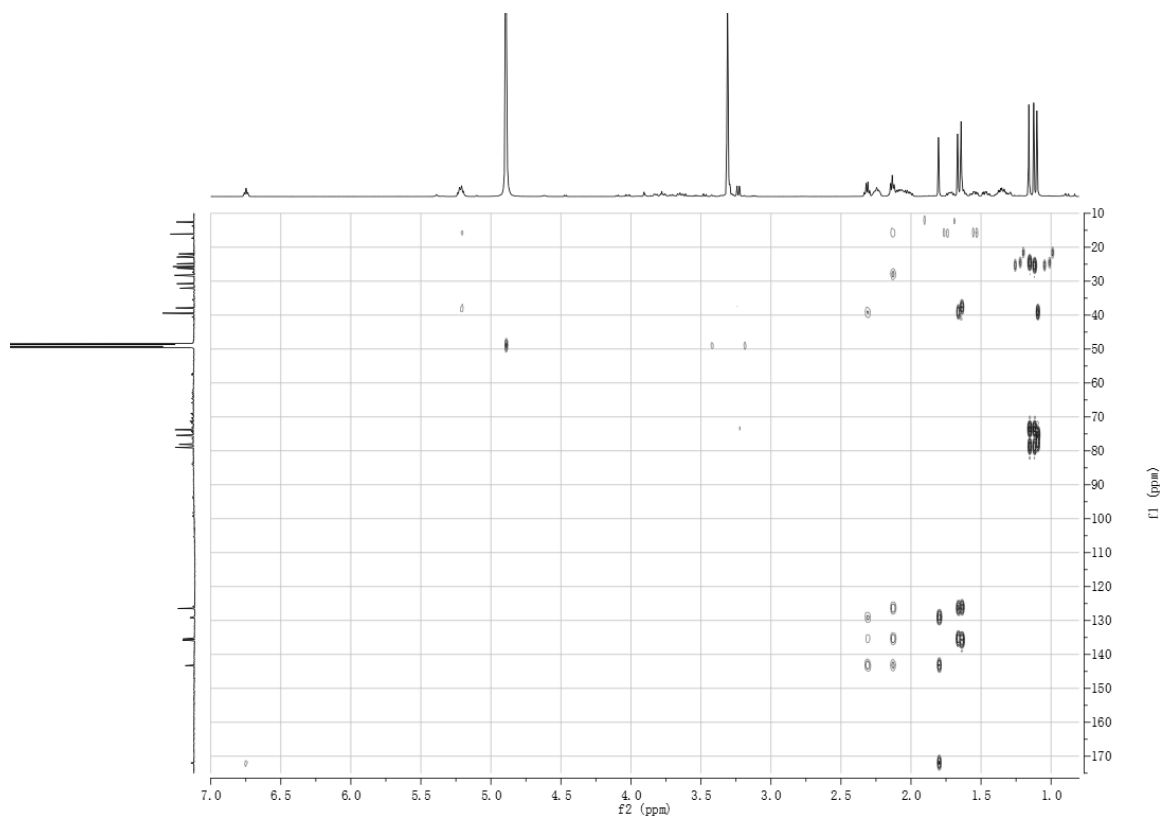

**Figure S3M** HMBC spectrum of sesterterpene **2**

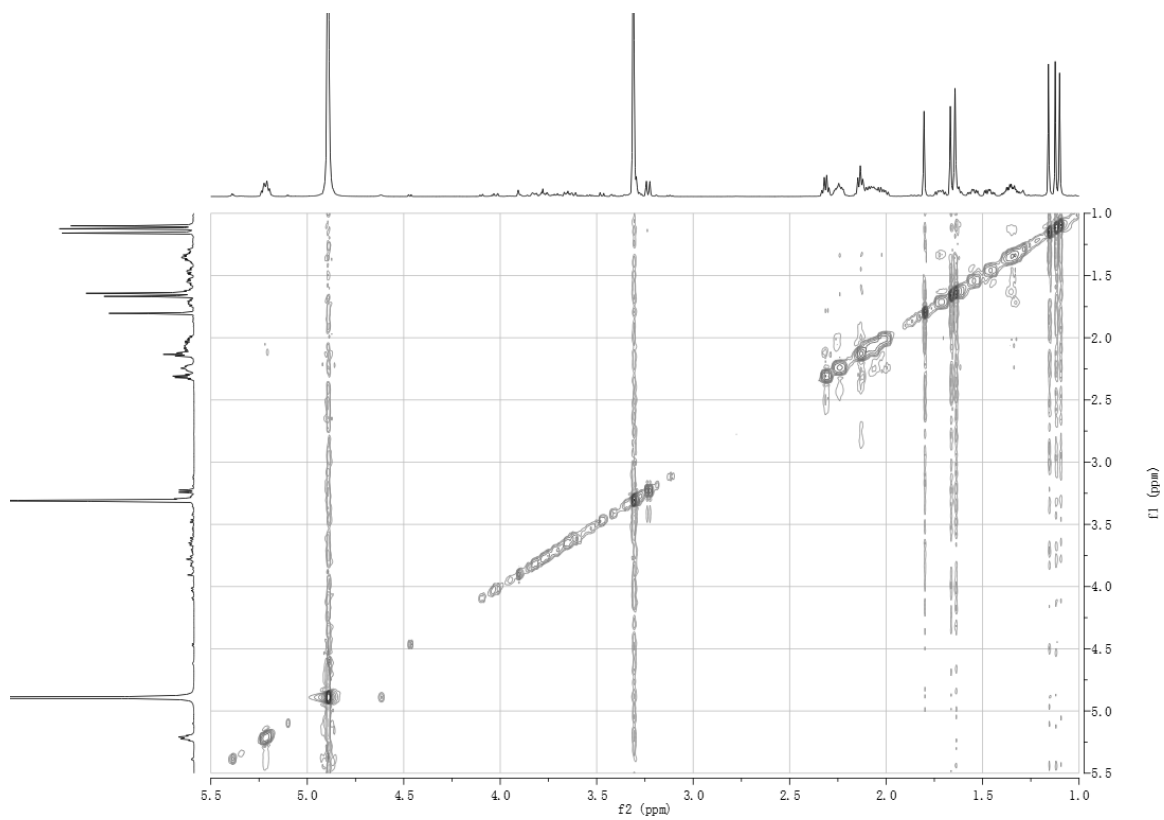

**Figure S3N** NOESY spectrum of sesterterpene **2**

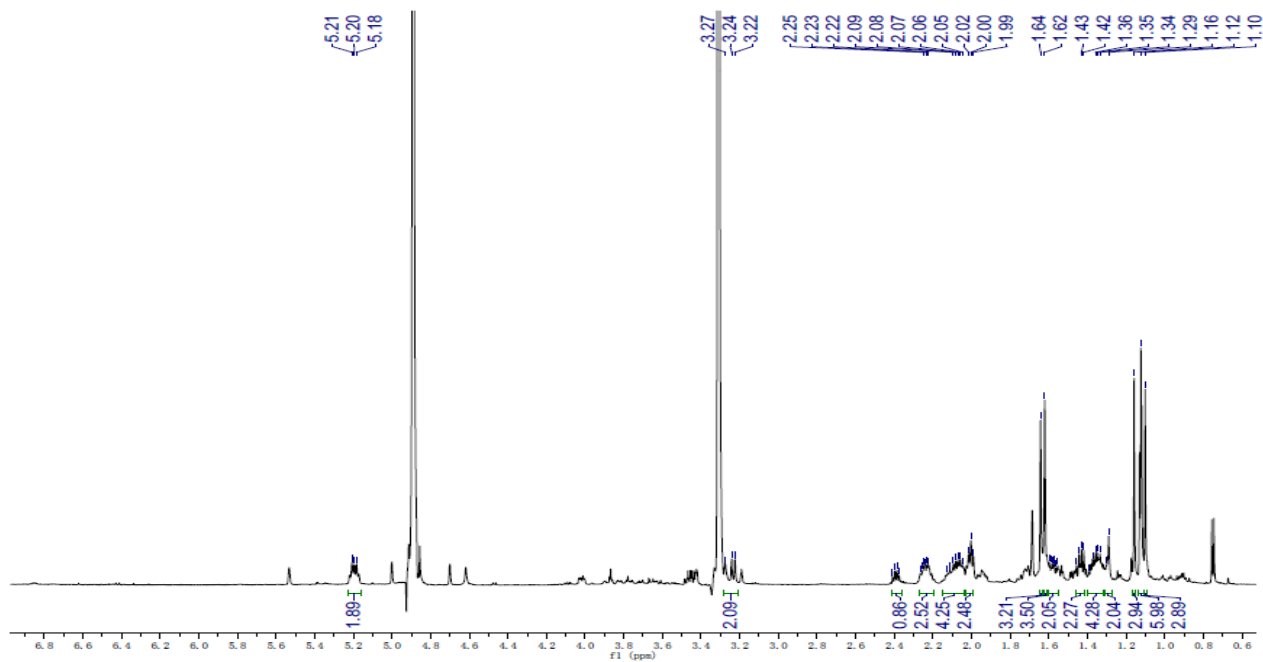

**Figure S30** <sup>1</sup>H-spectrum of sesterterpene **3**

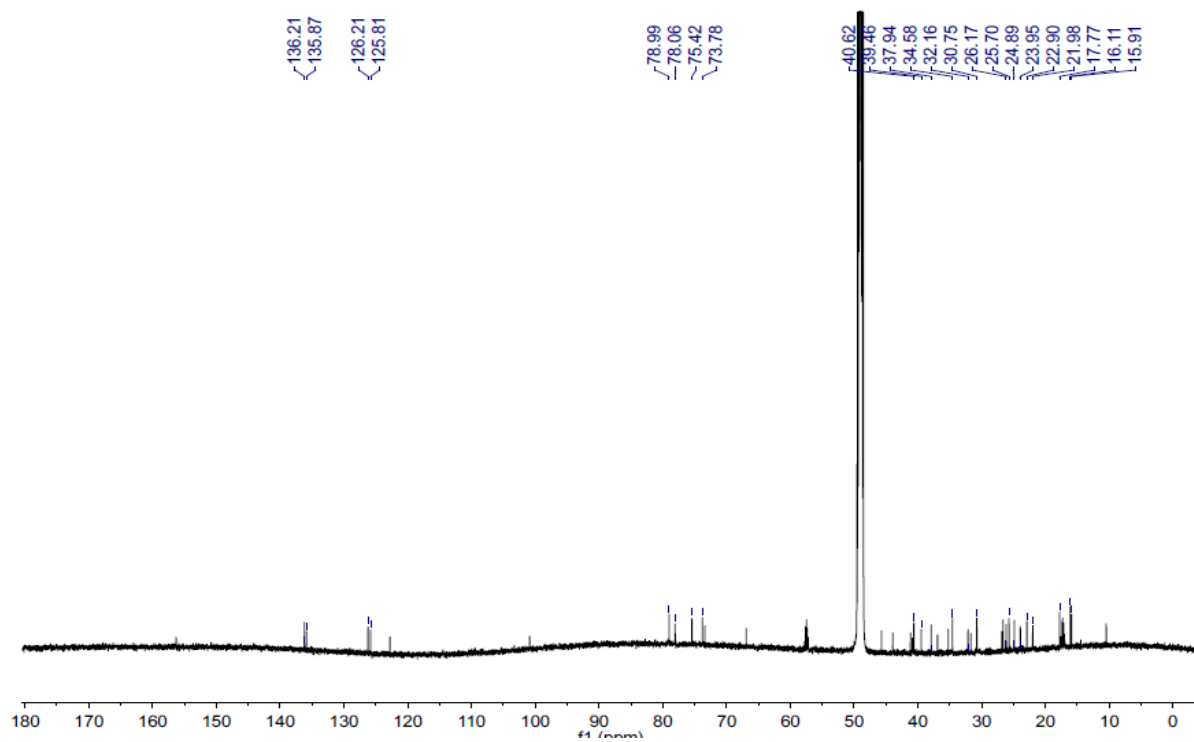

Figure S3P  $^{13}\text{C}$ -spectrum of sesterterpene 3
